1 **Patient-derived Glioblastoma Stem cells transfer mitochondria through Tunneling Nanotubes in**  
2 **Tumor Organoids**

3

4 Giulia Pinto\* <sup>1,2</sup>, Inés Saenz-de-Santa-Maria\* <sup>1</sup>, Patricia Chastagner<sup>1</sup>, Emeline Perthame<sup>3</sup>, Caroline  
5 Delmas<sup>4</sup>, Christine Toulas<sup>4</sup>, Elizabeth Moyal-Jonathan-Cohen<sup>4</sup>, Christel Brou<sup>§1</sup>, Chiara Zurzolo<sup>§1</sup>.

6 <sup>1</sup>Unité de Trafic Membranaire et Pathogénèse, Institut Pasteur, UMR3691 CNRS, 28 rue du Docteur  
7 Roux, F-75015 Paris, France

8 <sup>2</sup>Sorbonne Université, ED394 - Physiologie, Physiopathologie et Thérapeutique, F-75005 Paris,  
9 France

10 <sup>3</sup>Hub de Bioinformatique et Biostatistique – Département Biologie Computationnelle, Institut  
11 Pasteur, USR 3756 CNRS, F-75015 Paris, France

12 <sup>4</sup>Institut National de la Santé et de la Recherche Médicale (INSERM) UMR 1037, Cancer Research  
13 Center of Toulouse (CRCT); Institut Claudius Regaud; Université Toulouse III Paul Sabatier, Toulouse  
14 F-31000, France.

15 \*These authors equally contributed to this work

16 §These authors equally contributed to this work

17

18 **Corresponding authors:** [chiara.zurzolo@pasteur.fr](mailto:chiara.zurzolo@pasteur.fr) (+33 (0)1 45 68 82 77)

19

20 **Abstract**

21 Glioblastoma (GBM) is the most aggressive brain cancer and its relapse after surgery, chemo and  
22 radiotherapy appears to be led by GBM stem cells (GSLCs). Also, tumor networking and intercellular  
23 communication play a major role in driving GBM therapy-resistance. Tunneling Nanotubes (TNTs),  
24 thin membranous open-ended channels connecting distant cells, have been observed in several  
25 types of cancer, where they emerge to drive a more malignant phenotype. Here, we investigated  
26 whether GBM cells are capable to intercommunicate by TNTs. Two GBM stem-like cells (GSLCs) were  
27 obtained from the external and infiltrative zone of one GBM from one patient. We show, for the  
28 first time, that both GSLCs, grown in classical 2D culture and in 3D-tumor organoids, formed  
29 functional TNTs which allowed mitochondria transfer. In the organoid model, recapitulative of  
30 several tumor's features, we observed the formation of a network between cells constituted of both  
31 Tumor Microtubes (TMs), previously observed *in vivo*, and TNTs. In addition, the two GSLCs  
32 exhibited different responses to irradiation in terms of TNT induction and mitochondria transfer,  
33 although the correlation with the disease progression and therapy-resistance needs to be further  
34 addressed. Thus, TNT-based communication is active in different GSLCs derived from the external  
35 tumoral areas associated to GBM relapse, and we propose that they participate together with TMs  
36 in tumor networking.

37

38 **Keywords:** tunneling nanotubes, cancer, glioblastoma, cell communication, stem cells

39

## 40 Introduction

41 Glioblastoma (GBM) is the most common and aggressive brain cancer which nowadays lacks  
42 understanding and resolute therapeutic strategies. After surgery, patients undergo a mixture of  
43 chemo and radiotherapy[1], aiming to kill the remaining cancer cells at the edges of the resected  
44 region. Although these treatments have been proven to be effective in extending patients  
45 survival[2], lethal relapse from these peripheral regions occurs in 100% the cases. The elevated  
46 intra-tumoral heterogeneity seems to be at the origin of the relapse and particularly due to the  
47 presence of GBM stem cells (GSCs) that have been found to be the most resistant to treatments[3–  
48 6]. Moreover, it has been shown that post-surgical treatments can induce cellular plasticity and  
49 trans-differentiation resulting in more aggressive phenotypes[7]. How this occurs is still not clear,  
50 however it appears that intercellular communication in the tumoral context has a major role in the  
51 plasticity, survival and progression of many different types of cancer[8,9]. In particular, in the case  
52 of GBM, Winkler and colleagues have shown that patient-derived GSCs, xenografted into murine  
53 brains, are able to grow tumors where cells interconnect through membranous extensions and form  
54 a unique communicating network[10]. These protrusions called Tumor Microtubes (TMs) range in  
55 the microscale for their diameter ( $>1\mu\text{m}$ ) and could extend for over  $500\mu\text{m}$  in length, creating a  
56 complex tumor cell network. TMs allow the propagation of ion fluxes through GAP-junctional  
57 proteins, such as Connexin43 (Cx43), providing a fast, neurite-like, communication between cancer  
58 cells. These extensions could also drive the repopulation of surgically-injured areas[11]. TM-  
59 connected cells resulted to be resistant to chemo and radiotherapy, and the resistance was lost  
60 following the inhibition of TM-inducers such as Cx43, GAP43 and TTYH[10–12].

61 Another mechanism of intercellular communication that has been recently proposed to facilitate  
62 tumor progression is represented by Tunneling Nanotubes (TNTs)[13,14]. TNTs are thin cellular  
63 extensions connecting distant cells observed in a wide variety of cellular and murine models as well  
64 as in *ex vivo* resections from human tumoral tissue[13]. They are membranous structures supported  
65 by an actin-based cytoskeleton and, differently from other cellular protrusions, including TMs  
66 (assumed to provide communication through GAP-junction), are open at both extremities, thus  
67 allowing cytoplasmic continuity between connected cells[15,16]. TNTs allow the transfer of various-  
68 sized cargos, such as small molecules (e.g.  $\text{Ca}^{2+}$  ions), macromolecules (e.g. proteins, nucleic acids)  
69 and even organelles (vesicles, mitochondria, lysosomes, autophagosomes, etc.)[17]. They appear to  
70 play a critical role in several physio-pathological contexts, as in the spreading of protein aggregates

71 in various neurodegenerative diseases[18–22] or in the transmission of bacteria[23] and  
72 viruses[24,25] and , possibly, during development[26]. Functional TNTs have been shown in a variety  
73 of cancers using *in vitro* and *ex vivo* models [13] where they could be exploited as route for the  
74 exchange of material between cancer cells or with the tumoral microenvironment. As consequence  
75 of this transfer, cells can acquire new abilities as enhanced metabolic plasticity, migratory  
76 phenotype, angiogenic ability and therapy-resistance. In particular, the transfer of mitochondria has  
77 been related to all the previously mentioned features since they can provide energy and metabolic  
78 support to the cancer cells in displaying their aggressive features as observed in various  
79 cancers[14,27].

80 Few studies have reported TNT-like communication in GBM cells lines[28–30], suggesting that their  
81 presence and functionality could be induced/affected by the treatments, contributing to the  
82 tumoral progression and treatment-resistance [31,32]. However, no data on the role of TNTs are  
83 available in the context of a whole GBM tumor or in primary GSCs. This is likely due to the fragility  
84 of these connections and to the low-resolution images that can be obtained in the *in vivo* studies  
85 [10]. Whether in GBM intercellular communication is orchestrated exclusively by TMs or whether  
86 TNTs are also present and functional is still not known. Here, we investigate for the first time if TNTs  
87 can be formed between patient-derived GSCs and be exploited for exchange cargos using a  
88 quantitative approach. We used GSCs derived from the infiltrative region of the tumor, responsible  
89 for GBM relapse, thus representing a relevant model for the progression of the disease. In these  
90 cells we addressed TNT presence and functionality in both classical adherent cell culture as well as  
91 in 3D tumor organoids as well as the effect of radiotherapy on the TNT-mediated communication.

## 92 **Material and Methods**

93

### 94 **Cell culture**

95 GBM samples were processed as described by Avril et al. 2011[33]. GSLCs were cultured in  
96 suspension in DMEM-F12 (Sigma) supplemented with B27 (50x Gibco), N2 (100x Gibco) and 20  
97 ng/ml of FGF-2 and EGF (Peprotech) at 37°C in 5% CO<sub>2</sub> humidified incubators. Fresh medium was  
98 added to the cell culture every 2-3 days. All GSLCs were used for the experiments in this medium at  
99 less than 25 passages. Absence of alteration upon culture passages on the stemness phenotype was  
100 monitored by RT-qPCR. Absence of mycoplasma contamination was verified with MycoAlert™  
101 Mycoplasma Detection Kit (Lonza). All methods were carried out in accordance with the approved  
102 guidelines of our institution.

103

### 104 **Lentivirus preparation and transduction**

105 Lentiviral particles were produced in human 293T cultured in in Dulbecco's Modified Eagle's  
106 Medium (ThermoFisher), supplemented with 10% Fetal Bovine Serum (EuroBio) and 1% Pen/Strep  
107 (100x Gibco) at 37°C in 5% CO<sub>2</sub> humidified incubators. Cells were plated at a 50-70% confluency the  
108 day before the transfection. Plasmids coding for lentiviral components, pCMVR8,74 (Gag-Pol-Hiv1)  
109 and pMDG2 (VSV-G) vectors, and plasmid of interest at a ratio of 4:1:4, respectively were  
110 transfected using FuGENE HD Transfection reagent according to manufacturer's protocol. MitoGFP  
111 (pLV-CMV-mito-GFP) and mCherry (pLV-CMV-mCherry) plasmids encode respectively for a fragment  
112 of the subunit VIII of human cytochrome C oxidase fused with GFP, and for cytosolic mCherry under  
113 the Cytomegalovirus (CMV) promoter. Viral particles were concentrated using LentiX-Concentrator  
114 (TakaraBio) after 48 hours, and GSLCs were infected and tested for the expression of the fluorescent  
115 marker by flow cytometry at different time points to monitor expression stability.

116

### 117 **Tumor organoids preparation and culture**

118 Tumor organoids were prepared according to the protocol published in Hubert et al. 2016[34] and  
119 cultured in Neurobasal medium (ThermoFisher) supplemented with B27 (50x Gibco), N2 (100x  
120 Gibco), 1% Pen/Strep (100x Gibco), 2 mM L-Glutamine (100x Gibco), 20 ng/ml of FGF, 20 ng/ml EGF

121 (Peprotech) and 1.6 mL of GelTrex (ThermoFischer) at 37°C in 5% CO<sub>2</sub> humidified incubators up to  
122 23 days. Part of the cultured medium was removed and replaced with fresh one every 2-3 days.

123

#### 124 **TNT counting**

125 TNTs were identified according to the protocol of Abounit et al., 2015[35]. Cell were plated at the  
126 ideal cell density for the observation of TNTs (40000 cells/cm<sup>2</sup> for both GSLCs). The adhesion surface  
127 was previously coated with laminin 10 µg/mL (Sigma) for at least 2 hours. GSLCs were fixed after 6  
128 hours, to avoid excessive cell flattening on the coated surface. 15 minutes fixation in solution 1 (2%  
129 PFA, 0.05% glutaraldehyde and 0.2 M HEPES in PBS) followed other 15 minutes in solution 2 (4%  
130 PFA and 0.2 M HEPES in PBS) were performed at 37°C in order to preserve TNTs integrity[35]. Plasma  
131 membrane was labelled with fluorescent Wheat Germ Agglutinin (1:500 in PBS, Life Technologie)  
132 for 20 min at RT. Nuclei were stained with DAPI (1:5000 Sigma-Aldrich) before mounting with  
133 Mowiol.

134 Tile confocal images were acquired with a Zeiss LSM 700 controlled by ZEN software. Optimal image  
135 stack was applied. The whole volume of the cells was acquired. All the images were processed using  
136 ICY software in order to manually count the number of TNT-connected cells. Cells connected  
137 through thin, continuous, phalloidin-positive connections were counted as TNT-connected cells.

138

#### 139 **Immunofluorescence**

140 Cell were seeded on glass coverslips at the TNT-density previously mentioned. Coverslips were  
141 coated with 10 µg/mL laminin (Sigma). Cells were fixed with 4% PFA for 20 minutes at RT. Quenching  
142 and permeabilization steps were performed using 50 nM NH<sub>4</sub>Cl solution and 0.1-0.2% Triton-X100,  
143 respectively. Primary antibodies were incubated in 10% FCS-containing PBS solution for 1 hour. Anti  
144 -αTubulin (1:1000 Sigma-Aldrich T9026), anti-TOM20 (1:500 Santa Cruz Biotechnology sc-11415)  
145 and anti-GAP43 (1:500 Cell signalling 8945S) were used. Cells were incubated for 45 minutes with  
146 secondary antibody anti-mouse and anti-rabbit Invitrogen Alexa 488, 564 or 647 antibodies (1:1000)  
147 or Rhodamine-conjugated Phalloidin (1:200, R415 Invitrogen). DAPI (1:5000 Sigma-Aldrich) in PBS  
148 solution was applied for 5 minutes before washes and mounting with Mowiol.

149 Organoids were fixed with a solution of 4% PFA for 1 hour at 37°C, washed with PBS-0.5% Tween  
150 and incubated in a solution of PBS + 10% FBS + 0.3% BSA (Sigma-Aldrich ) + 0.3% Triton-X100 0.3%  
151 containing primary antibody (mentioned above) overnight at 4°C. Organoids were incubated in the  
152 same solution with the corresponding secondary antibody or Rhodamine-conjugated Phalloidin  
153 overnight at 4°C, incubated with DAPI (1:1000 Sigma-Aldrich) over 6h and finally mounted with a  
154 solution of 70% Glycerol.

155 Immunofluorescence stainings were analysed on a Zeiss LSM 700 inverted confocal microscope (Carl  
156 Zeiss, Germany), with a Pln-Apo 10X/0.45 to image the entire organoid, 40X: EC Pln-Neo 40X/1.3  
157 (NA = 1.3, working distance = 0.21mm) or Pln-Apo 63X/1.4 (NA = 1.4, working distance = 0.19mm)  
158 oil lens objective and a camera (AxioCam MRm; Carl Zeiss).

159

#### 160 **Time-lapse Microscopy**

161 Time-lapse microscopy imaging in 2D- and 3D-conditions was performed on an inverted Spinning  
162 Disk microscope (Eclipse Ti microscope system, Nikon Instruments, Melville, NY, USA) using  
163 60 × 1.4NA CSU oil immersion objective lens using Bright field and Laser illumination 488. Pairs of  
164 images were captured in immediate succession with one of two cooled CCD cameras, which enabled  
165 time intervals between 20 and 30 s per z-stack. For live cell imaging, the 37 °C temperature was  
166 controlled with an Air Stream Stage Incubator, which also controlled humidity. Cells placed in Ibidi  
167  $\mu$ -Dish 35 mm and incubated with 5% CO<sub>2</sub> during image acquisition. Image processing and movies  
168 were realized using MetaMorph, FIJI and Imaris software. Time-lapse movies of mitochondria  
169 trafficking were created using ImageJ/Fiji software.

170

#### 171 **Quantification of mitochondria transfer by flow cytometry**

172 Transfer assays were performed accordingly to the protocol of Abounit et al., 2015[35]. Stable GSLCs  
173 population expressing respectively MitoGFP were used as donor cells and mCherry as acceptor cells  
174 and mixed in a 1:1 ratio. For the 2D co-culture, cells were plated at the density previously mentioned  
175 (see TNT counting). Cells were detached after 2 or 5 days of co-culture with StemPro Accutase  
176 (Thermofisher), experimental duplicates were performed for each timepoint and each condition. To  
177 monitor the transfer by secretion in 2D co-culture, donor and acceptor cells were co-cultured  
178 separated by a 1  $\mu$ m filter. For tumor organoids, donor and acceptor cells were mixed 1:1 during the

179 organoid preparation. At each timepoint, duplicates of a pool of 3 organoids were disaggregated  
180 using mechanical and chemical (StemPro Accutase, Thermofisher) dissociation. To monitor the  
181 transfer by secretion, organoids prepared of only acceptor or donor cells were cultured in the same  
182 culture medium separated by a 1  $\mu\text{m}$  filter. For FACS analysis, cells were passed through a cell  
183 strainer to separate cell aggregates and fixed in 2% PFA. Flow cytometry data were acquired with a  
184 BD Symphony A5 flow cytometer. GFP and mCherry fluorescence were analysed at 488 nm and 561  
185 nm excitation wavelength, respectively. 10,000 events were acquired for each condition and data  
186 were analysed using FlowJo analysis software.

187

### 188 **The extracellular flux cell mitochondrial stress analysis (Seahorse assay)**

189 An extracellular flux analyser (Seahorse XF96, Agilent, USA) was applied to analyse the  
190 mitochondrial function. The XF96 possesses a specialized microplate that allows for the  
191 measurement of the oxygen consumption rate (OCR) in real-time [36]. To test mitochondrial  
192 respiration, an XF Cell Mito Stress Test kit (Seahorse Bioscience; Agilent Technologies, Inc.) was used  
193 according to the manufacturer's protocol. The day previous to assay, the cells were seeded at a  
194 density of 20,000 cells/well in a laminin-precoated seahorse plate and incubated overnight at 37°C  
195 and 5% CO<sub>2</sub>. The sensor cartridge was hydrated in pure water at 37°C in a non-CO<sub>2</sub> incubator  
196 overnight. On the day of the assay, the sensor cartridge was incubated in XF Calibrant 1h at 37°C in  
197 a non-CO<sub>2</sub> incubator prior to the assay. The culture medium was refreshed 1 h prior to the assays  
198 using unbuffered DMEM (pH 7.4) supplemented with 1 mM pyruvate, 2mM glutamine, and 10 mM  
199 glucose (Seahorse Bioscience; Agilent Technologies, Inc.). Briefly, 1  $\mu\text{M}$  oligomycin, 1 $\mu\text{M}$  carbonyl  
200 cyanide-4-(trifluoromethoxy) phenylhydrazone (FCCP), and 0.5  $\mu\text{M}$  rotenone/antimycin A were  
201 subsequently added to the microplates. This enabled determination of the basal level of oxygen  
202 consumption, ATP-linked oxygen consumption, non-ATP-linked oxygen consumption, the maximal  
203 respiration capacity, and the non-mitochondrial oxygen consumption. A total of three basal OCR  
204 measurements were recorded prior to the injection of oligomycin. The decreased level of OCR  
205 represented oligomycin-sensitive OCR due to its inhibition of ATP synthase (complex V). FCCP, an  
206 uncoupling protein, was then injected and the FCCP-stimulated OCR was used to calculate spare  
207 respiratory capacity, which was defined as the difference between maximal respiration and basal  
208 respiration. The third injection was a mixture of rotenone (a complex I inhibitor) and antimycin A (a  
209 complex III inhibitor). This combination inhibited mitochondrial respiration completely, and thus no



210 oxygen was further consumed by cytochrome c oxidase. The remaining OCR measurement obtained  
211 following this treatment was primarily non-mitochondrial and may have been due to cytosolic  
212 oxidase enzymes.

213

#### 214 **Irradiation**

215 Irradiation was performed with X-Ray machine (Xstrahl LTD). 2 Gy irradiation was performed  
216 exposing the cells to X-rays for 1 minute and 25 seconds (250 kV, 12 mA).

217

#### 218 **RT-qPCR**

219 Total RNA extraction was performed using the RNeasy Mini Kit purchased from Qiagen. Reverse  
220 transcription was done using the Biorad iScript gDNA Clear cDNA Synthesis Kit. Oligonucleotides  
221 were designed using Prime PCR Look Up Tool (Bio-Rad), purchased from Eurofins Genomics, and  
222 sequences are presented in Supplementary Table 1. Quantitative PCR was then performed using the  
223 Bio-Rad iTaq™ universal SYBR® Green supermix and analysed using a CFX96™ real-time PCR  
224 detection system under the CFX Manager software (Bio-Rad). Gene expression was normalized to  
225 hypoxanthine-guanine phosphoribosyltransferase (HPRT), each point of each independent  
226 experiment was performed in triplicates. Oligonucleotides used in qPCR are presented in  
227 Supplementary Table 1.

228

#### 229 **Statistical analysis**

230 The statistical tests for percentage of connected cells and percentage of transfer were computed  
231 using either a logistic regression model computed using the 'glm' function of R software  
232 ([https://www.R-project.org/.](https://www.R-project.org/)) or a mixed effect logistic regression model using the lmer[37] and  
233 lmerTest[38] R packages. For cell connection in 2D, a mixed effect logistic regression model was  
234 estimated, adjusted on the effect of cell type, timepoint and condition. This model was also adjusted  
235 on the second and third order interactions among these 3 covariates. A random effect  
236 corresponding to replication of the experiment was also added to the model in order to account for  
237 potential batch effect. For percentage of transfer, we estimated a mixed effect logistic regression  
238 model adjusted on the condition, the day and the number of organoids. Second order interactions

239 among condition and day and among number of organoids and day were added to the model in  
240 order to normalize statistical tests on time-varying heterogeneity of the number of organoids. A  
241 random effect corresponding to replication of the experiment was also added to the model in order  
242 to account for potential batch effect. All statistical tests to compare groups (among either cell lines,  
243 timepoints or treatments) were deduced by computing contrasts of one the abovementioned  
244 logistic model. P-values were therefore adjusted using Tukey's method. To compare the gene  
245 expression measured by RT-qPCR, Holm-Sidak method was applied to determine statistical  
246 significance, with  $\alpha=5$ . ANOVA two-way test was performed to compared cell number at  
247 different timepoints of the adherent culture. For the comparison of cell number in tumor organoids,  
248 the number of cells was transformed in logarithmic scale and slopes were compared.

249 **Results**

250

251 **1) Patient-derived GBM cells with stem-like features form TNT-like connections**

252 We obtained two GBM cells from a single tumor from a patient in the frame of the clinical trial  
253 STEMRI (Identifier: NCT01872221). This trial was aimed at studying the tumoral cells surrounding  
254 the core tumor after the latter has been surgically removed, and better understanding and possibly  
255 anticipating which of them are at the origin of the relapse. Two bulks of tissue were resected from  
256 the infiltrative tumor area defined by the Fluid-attenuated inversion recovery (FLAIR) sequence on  
257 MRI (Fig.1A) and characterized by multimodal MRI spectroscopy for their metabolic activity through  
258 the measurement of the Choline/N-AcetylAspartate Index (CNI) [39,40] (Supplementary Fig.1A). The  
259 tissues were then desegregated and cultured in stem cell medium[7] to enrich in GBM stem cells  
260 rather than differentiated ones[33], and grown in suspension in neurosphere-like aggregates  
261 (Fig.1B). To further characterize the two populations, named C1 and C2, we monitored the  
262 expression of genes associated with different cell types, from differentiated to progenitor/stem  
263 cells[4,6,41–44]. GFAP and CHI3L1 (respectively astrocytic and mesenchymal markers) were not  
264 expressed and low expression was observed for the neural markers Tub $\beta$ 3 and GAP43. On the other  
265 hand, expression of the progenitor and stem cell markers Olig1, Olig2, Sox11 and Sox2 was  
266 significant (Fig.1C). This pattern of gene expression was retained over passages in culture indicating  
267 maintenance of the stemness properties distinctive of GBM stem-like cells (GSLCs) [3]. We further  
268 characterized the C1 and C2 cells by Agilent Seahorse XF Cell Mito Stress Test allowing us to monitor  
269 mitochondrial function by directly measuring the aerobic respiration of cells. We observed that C2  
270 and C1 cells behave in accordance to their respective region of origin (Supplementary Fig.1A).  
271 Indeed, the C2 population, derived from the highest metabolic area of the external tumoral region  
272 (CNI>2), displayed higher maximal respiration and spare respiratory capacity compared to C1 cells  
273 originated from a lower metabolically active area (CNI<2). On the contrary, C1 cells presented higher  
274 levels of non-mitochondrial oxygen consumption and basal respiratory capacity than C2 cells (n=3,  
275 Supplementary Fig.1B). These data are consistent with a higher mitochondrial oxidative  
276 phosphorylation phenotype in the C2 than in C1.

277 Different GBM-derived cell lines have been described to form TNT-like connections and to be able  
278 to transfer cellular content including mitochondria[28–31]. Because such cell lines are only partially

279 recapitulative of the original tumoral features[45], here we aimed to address whether patient-  
280 derived GSLCs can form functional TNTs. Thus, C1 and C2 cells were plated for 6h on laminin-coated  
281 surface in 2D culture to make them adhere to the support for ease of TNT recognition. Thin cell  
282 connections were detected after 6 hours of culture by live imaging (Fig.1D). After fixation, we  
283 assessed the presence of actin-containing connections floating above the laminin coated surface,  
284 which is a distinguishing characteristic of TNTs, that hover above the substrate, as exemplified in  
285 Fig.1E, where both attached-to-the-substrate ( $z\text{-stack}=0$ ) and above ( $z\text{-stack}>3$ ) stacks are  
286 shown[35,46]. GSLC TNTs resulted to be always positive for actin and negative for microtubules  
287 markers, consistent with the description of classical TNTs[16] (Fig.1E). For quantification of TNTs,  
288 we labelled the cell's plasma membrane with fluorescent-Wheat Germ Agglutinin (WGA) and  
289 counted thin, continuous, non-attached to the substratum protrusions[35] connecting distant cells.  
290 Both C1 and C2 populations formed TNT-like connections with a significantly different frequency:  
291 about 10% of TNT-connected cells in C1 and 15% in C2 (Fig.1F). These data showed for the first time  
292 that GSLCs, derived from the infiltrative region of the tumor, can interconnect through TNT-like  
293 structures.

294

## 295 **2) TNT-like structures of GSLCs can transfer mitochondria**

296 TNTs are described to be open-ended connections allowing the passage of cellular cargoes. To  
297 determine whether the connections observed were apt to this purpose, we decided to assess the  
298 transfer of mitochondria, shown to occur in several types of cancer cells (mesothelioma, leukemias,  
299 ovarian, etc.)[13,14,27]. To observe mitochondria in living samples, we introduced a GFP-tagged  
300 fragment of the subunit VIII of human cytochrome C oxidase located in the inner mitochondrial  
301 membrane (MitoGFP) in both GSLCs by lentiviral transduction. We then performed live-imaging on  
302 GSLCs and found mitochondria moving inside TNT-like structures and entering into a connected cell  
303 (Fig.2A, Supplementary video 1), supporting an open-ended TNT relying the two cells. To quantify  
304 this transfer, we performed co-culture assays[35] between a donor population, expressing MitoGFP,  
305 and an acceptor cell population transduced with lentivirus governing the expression of cytosolic  
306 mCherry (Fig.2B). More than 80% of each cell population was stably expressing the constructs,  
307 allowing a 1:1 co-culture ratio between the two populations. Cells were plated on laminin-coated  
308 surface and grown either in direct contact or separated by a filter (transwell) (Fig. 2B), and the  
309 percentage of mitochondria transfer was assessed after 2 or 5 days of co-culture by flow

310 cytometry[35]. Between 1 and 3% of acceptor cells received donor-derived mitochondria,  
311 exclusively due to a contact-dependent mechanism since negligible transfer was observed when the  
312 two cell populations were separated by filter but shared the same medium (Fig.2C). Furthermore,  
313 the percentage of acceptor cells receiving mitochondria was increasing over time in both GSLCs  
314 (Fig.2D). It is worth noting that C2 had higher mitochondria transfer compared to C1, in accordance  
315 with the higher percentage of TNT-connected cells in this population (Fig.1F). As both GSLCs had a  
316 similar proliferation rate in this condition (Fig.2E) we could rule out that the different transfer  
317 abilities of the two cell types was related to differences in cell densities. Next, to confirm that the  
318 fluorescence signal detected by flow cytometry corresponded to true mitochondria inside acceptor  
319 cells, confocal microscopy was performed in the same co-culture conditions used for the flow  
320 cytometry experiments. By this mean MitoGFP puncta (Fig.2F) which overlapped with TOM20  
321 (Translocase of the Outer Membrane, Supplementary Fig.2) were observed in acceptor cells. These  
322 data indicate that both C1 and C2 GSLCs are able to form functional TNTs when cultured in 2D.  
323 However, C1 and C2 transfer mitochondria with distinct efficiencies, consistent with their distinct  
324 abilities to form TNTs (Fig.1F).

325

### 326 3) TNT-like structures exist in GSLC tumor organoids together with TM-like protrusions

327 In order to assess the participation of the TNT-mediated communication to GBM networking in a  
328 context more representative of the tumor, we cultured individually each GSLCs in tumor organoids,  
329 according to the protocol published by J. Rich and colleagues[34]. Tumor organoids are a relevant,  
330 3-dimensional, culture method which allows long-term growth preserving the stem cell identity of  
331 some cells and reconstitutes, to some extent, the morphological and phenotypic heterogeneity of  
332 the original tumor[34]. We were able to grow C1 and C2 -derived tumor organoids up to more than  
333 23 days of culture. To characterize the transcriptional changes undergone by the cells in this culture  
334 system, we quantified the expression of differentiation and progenitor/stem markers in 23-days-old  
335 organoids by RT-qPCR. We observed no significant variation in the expression of all tested genes  
336 compared to classical culture, except of GAP43 in C2 cells (Fig 3B), that resulted to be 12-fold higher  
337 in organoids. This result showed that although most of the cells still expressed progenitor markers,  
338 maintaining therefore their multipotency, some could also commit to a more differentiated profile,  
339 as it happens *in vivo*.

340 To date, TNT visualization in 3D cultures and their quantification had not been reported, as  
341 preserving and identifying these fragile thin structures in 3D is extremely challenging. In both C1  
342 and C2 -derived tumor organoids, fluorescently labelled with phalloidin and anti- $\alpha$ Tubulin antibody  
343 and imaged with confocal microscopy, we observed different types of cell protrusions (Fig.3C).  
344 Specifically, we noticed thin ( $<1 \mu\text{m}$ ), actin-rich structures (devoid of tubulin) resembling TNTs that  
345 were found connecting cells already within the first week of organoids culture. However, the  
346 resolution of light microscopy doesn't allow to assess if these connections were functional TNTs  
347 or close-ended protrusions (like filopodia) [16]. One possibility to address this, is to look for the  
348 presence of organelle inside the connections and assess transfer. To this aim, first we imaged tumor  
349 organoids prepared with GSLCs stably expressing MitoGFP construct. Several cell extensions were  
350 found to be rich in content of mitochondria (Supplementary Video 2). Of note, by using live-imaging  
351 we observed thin TNT-like connections containing mitochondria trafficking between two connected  
352 cells (Fig.4A, Supplementary Video 2, white arrow, and Supplementary Fig.3), in accordance with  
353 what was observed in 2D. Next, to quantify mitochondrial transfer, we prepared tumor organoids  
354 mixing MitoGFP donor and mCherry acceptor cells in a 1:1 ratio. After 6, 9, 13, 16, 20 and 23 days  
355 of co-culture inside the same organoids, duplicates of 3 organoids per condition were desegregated  
356 (and combined) in a single cell suspension and analysed by flow cytometry for the presence of  
357 MitoGFP into acceptor mCherry-positive population (Supplementary Fig.5). The percentage of  
358 acceptor cells receiving mitochondria was increasing over time, reaching around 3% in C1 and 8% in  
359 C2 after 23 days of culture (Fig.4B, note the logarithmic y axis scale). Higher efficiency of transfer  
360 was observed in C2 cells when comparing the general trend of the transfer with the one of C1  
361 (Fig.4B), in agreement with the data obtained when cells were cultured in 2D. Mitochondria transfer  
362 was not related to cell proliferation as both GSLCs grow similarly in organoids (Fig.4C). Overall, these  
363 data were consistent with the results obtained in 2D and suggested that C2 have higher ability to  
364 form and use TNTs for transferring cellular content, compared to C1. To verify that mitochondria  
365 transfer was not due to secretion, we co-cultured organoids composed of only one cell population,  
366 either donor or acceptor cells, in the same medium. We have not observed any transfer of MitoGFP  
367 from donor organoids to acceptor organoids in these conditions over time (Supplementary Fig.5),  
368 strongly suggesting that the mitochondria transfer that we quantified in mixed organoids was  
369 dependent on direct cell contacts between donor and acceptor cells. Overall, these data also  
370 indicate that GSLCs form functional TNT-like connections able to transfer mitochondria.

371 Interestingly, in addition to the TNT-like connections described above, we also observed thick (>1  
372  $\mu\text{m}$ ) and long protrusions containing both actin and microtubules rather similar to TMs (previously  
373 observed *in vivo*[10], but not in the 2D cultures), which coexisted with TNTs in the same organoids  
374 (Fig.3C).

375 To better characterize TM-like protrusions we decided to evaluate the presence of GAP43, a TM  
376 specific marker described to be one of the major driver of TM formation [10]. Intriguingly, by RT-  
377 qPCR we had observed increased expression of this marker in C2- but not in C1-derived tumor  
378 organoids (Fig.3B). In agreement with these data, by immunofluorescence we observed an increase  
379 in the number of GAP43-positive C2 cells over time (see days 2, 6 and 13 labelling's in Fig.5A, and  
380 B), confirming that tumor organoids reproduced to some extent tumoral heterogeneity and  
381 structure. In addition, part, but not all, of TM-like extensions resulted positive for GAP43 (Fig.5C) in  
382 C2 organoids. Of interest, some of these thick TM-like structures in C1 and C2 organoids contained  
383 mitochondria (Supplementary video 2, red arrow). This was consistent with the observations of  
384 Winkler and colleagues [10], and also in our case mitochondria transfer was not detected through  
385 such structures[47]. The presence of these two types of connections, TM-like (also expressing  
386 GAP43) and TNT-like, was further confirmed in organoids produced from one GSLCs (O) derived  
387 from a second patient (Supplementary Fig.4), suggesting that the coexistence of TNTs and TMs in  
388 GBM could be recurrent in different tumors. Taken together, these results showed that the 3D  
389 organoid model using GSLCs is a valid representation of the tumoral complexity *in vivo*[34] and that  
390 various types of connections, including TNTs and TMs, could coexist in the network formed by  
391 GSLCs. However, only TNTs could provide a route for the exchange of cellular material, notably  
392 mitochondria.

393

#### 394 4) **Effect of irradiation on TNT-based communication in C1 and C2 GSLCs**

395 GBM relapse, originates from GSLCs [4] and treatments introduce alteration in GBM cells that seem  
396 to favors their survival [7]. As TNTs have been involved in cancer progression of different tumors  
397 [13] we decided to assess the effect of irradiation on the TNT-based communication in GSLCs. We  
398 irradiated cells at a dose of 2 Gray (Gy). This dose, daily administrated to GBM patients for five days  
399 a week for six weeks during radiotherapy [1], was applied only once on our cells in order to be  
400 effective but subtoxic[7] and preserve cell viability for all the duration of the experiment. Cells were  
401 plated on laminin-coated coverslips for 6 hours at 1, 3 and 6 days after the irradiation, and next

402 were fixed and analyzed for their TNT content. While C1 cells showed a slight decrease, not  
403 statistically significant, in their percentage of TNT-connected cells after irradiation, TNT frequency  
404 was significantly increased in C2 cells the day following the irradiation (Fig.6A), suggesting an acute  
405 effect induced by the irradiation in this population. To assess the effect of irradiation on the transfer  
406 of mitochondria, 2 Gy irradiation was applied on the donor cells the day before the co-culture and  
407 transfer was quantified after 2 or 5 days of co-culture. The percentage of C1 acceptor cells  
408 containing donor-derived mitochondria was not affected by irradiation, whereas we observed a  
409 tendency to an increased transfer upon irradiation in C2 (Fig.6B), although not statistically  
410 significant. Of note, in this experiment, C1 cells showed mild but significant reduction in their cell  
411 number at 5 days from irradiation, compared the control condition, differently from C2 cells which  
412 did not show significative variations (Supplementary Fig.6A). To assess variations of mitochondria,  
413 transfer upon irradiation on a long-term co-culture we irradiated C1 and C2 -derived organoids at  
414 day 5 of culture and assessed mitochondria transfer at various timepoints. After 23 days in culture,  
415 3% and 1.7% of transfer was observed, respectively, in C1 control and irradiated condition, showing  
416 a significant decrease of transfer in the irradiated condition (Fig.5C). On the other hand, in C2 there  
417 was no significant reduction of the transfer efficiency over time, with 8% and 7% of transfer  
418 observed in control and irradiated condition, respectively (Fig.6C). The different behaviour of C1  
419 and C2 cells was independent of the effect of irradiation on cell growth as the number of cells into  
420 both types of organoids was not significantly affected by irradiation (Supplementary Fig.6B), as  
421 expected with the chosen doses. Importantly, when co-culturing single population organoids in the  
422 same dish to assess the contribution of secretion in transfer we did not observe transfer.

423 Overall, consistent with the wide heterogeneity present in GBM tumors where distinct molecular  
424 profiles coexist and exhibit differential therapeutic responses[3], our data indicated that GSLCs  
425 derived from the same tumor display intrinsically different properties and have diverse response to  
426 irradiation regarding the effect on TNT formation and transfer function. Specifically, TNT  
427 functionality was preserved in C2 organoids after irradiation whereas it was reduced in C1  
428 organoids.

429

## 430 **Discussion**

431 Tunneling nanotubes (TNTs) are gaining an increasing relevance in the context of cancer  
432 development and progression[13]. Their presence and ability to transfer cellular material including



433 organelles, has been correlated with the induction of migratory ability, angiogenesis, cell  
434 proliferation and therapy-resistance[14,27]. Few reports have addressed the presence of TNTs in  
435 GBM, where it was shown that GBM-derived cell lines in culture were able to form TNT-like  
436 connections [28,29,32] and exchange mitochondria with healthy cells of the tumor  
437 microenvironment, while promoting cell aggressive phenotypes as increasing proliferation and  
438 treatment-resistance [30,31,48]. Nevertheless, at transcriptomic level GBM cells lines are drastically  
439 divergent from the original tumor [45], thus they do not appear to be a very relevant model for  
440 GBM. On the other hand, TNTs were not reported in patient-derived GSCs xenografted into murine  
441 brains, which formed a complex tumor cell network based on thicker neurite-like connections,  
442 called TMs [10]. In this elegant work the authors used live two-photon microscopy to image the  
443 implanted tumor with a resolution that might have not been sufficient to visualize TNTs. Thus,  
444 whether TNTs participate to this networking in a tumoral relevant model, but were not detected  
445 because of the approach used, is not yet clear. To address this question, here we have assessed  
446 their presence and functionality in two GSLCs derived from the most external tumoral area,  
447 responsible for GBM relapse. By using live-imaging and quantification of transferred mitochondria,  
448 we showed for the first time that GSLCs are able to interconnect and transfer mitochondria *via* TNT-  
449 like structures in 2D culture, in both GSLCs populations. Importantly, to visualize and characterize  
450 these connections and to monitor their ability to transfer mitochondria in a context closer to the  
451 tumor, we cultured these GSLCs as tumor organoids, a very relevant model shown before to  
452 recapitulate at phenotypic and transcriptomic level patient tumors heterogeneity[34,45,49].  
453 Indeed, in our organoid cultures, GSLCs maintained their progenitor characters over more than 23  
454 days. Using confocal microscopy in fixed conditions, we provided evidences for the existence of thin  
455 TNT-like protrusions connecting different cells in the organoids from early time in culture; while live-  
456 imaging demonstrated mitochondria moving along TNTs and entering into the connected cells.  
457 These observations supported the hypothesis that TNTs exist and are functional in GMB derived  
458 tumor organoids, suggesting that TNT-based communication may be relevant in the actual tumor.  
459 Because TNT communicative abilities were observed in the GSLCs obtained from the infiltrative and  
460 putative relapse-driving area, we could speculate that this might have a potentially relevant role in  
461 tumor recurrence and induction of aggressive phenotypes, as shown in the case of other tumors  
462 [13,14]. Nevertheless, the aggressiveness of GBMs has been correlated before with the  
463 establishment of tumor networking based on TMs [10]. TMs are neurite-like extensions[50], able to  
464 connect to distant cells and propagate action potential[51,52] and proposed to scaffold the network

465 formed by cancer cells. Interestingly, we also observed thicker connections resembling TMs in our  
466 GSLC tumor organoids. Although TMs are organelle-rich structures, no cargo transfer through them  
467 has been demonstrated[47], while the presence of GAP-junctions along their length[53] support  
468 their role in electric signal transmission. Our data confirmed these observations in organoids, since  
469 we could follow movements of mitochondria in cell bodies and protrusions, including TM-like  
470 structures. However, the effective transfer of mitochondria until entering a connected cell could be  
471 observed only through TNT-like connections, and not in TM[10,11,51]. Of note, we observed and  
472 quantified mitochondria transfer in both C1 and C2 GSLCs, grown in 2D culture conditions where  
473 none of them expressed GAP43, which is a typical marker and the major known driver of TMs[10,11],  
474 and in 3D organoids where only C2 subpopulations expressed GAP43, suggesting that the transfer  
475 of mitochondria does not occur through GAP43-dependent structures. Notwithstanding, we  
476 observed that C2 cells, which can express GAP43, were transferring mitochondria more efficiently  
477 compared to C1 cells, even after irradiation. These results are in accordance with the work of F.  
478 Winkler and collaborators[10,11] suggesting that GAP43 expression and the presence of TMs could  
479 be correlated to the aggressiveness of the tumor. Because we observed TNTs and TMs in the same  
480 organoid, we propose that TNTs and TMs coexist and cooperate in GBM networking, carrying on  
481 complementary roles that could participate eventually to treatment-resistance. In particular, we  
482 hypothesize that in a situation in which a TM tumor network is formed based on signalling exchanges  
483 between interconnected cells there will be the possibility to form more TNTs, which will provide the  
484 transfer function and material exchange (Fig.7). This hypothesis needs to be further tested *in vivo*,  
485 ideally in the conditions in which TMs have been observed before [10].

486 In our GSLC model we have chosen to specifically look at mitochondria transfer; as mitochondria  
487 can provide metabolic support to cancer cells[14,27], transfer of mitochondria has been shown to  
488 modulate the response to treatments in a beneficial manner for the recipient cells impacting on  
489 their metabolism, rescuing their aerobic respiration and providing a metabolic support against  
490 treatment-related stress[27,54]. However the observation of mitochondria transfer between GSLCs  
491 does not preclude the possibility that other cellular material (e.g. RNA, proteins, other vesicles)  
492 could be additionally transferred through the same connections, as observed in other cancer  
493 types[55–57]. Because of the limitation of our study, it will be of important in the future to address  
494 first what is the exact composition of transferred material, and second what are the functional  
495 consequences of such events for both donor and recipient cells.

496 Wide cellular heterogeneity is one of the many reasons that makes GBM very difficult to treat, as it  
497 is formed by cells with different abilities to respond to the treatments. We have shown that two  
498 GSLCs derived from two areas of the same tumor, also display different behaviour, including  
499 percentage of TNT-connected cells and transfer of mitochondria over time in response to  
500 irradiation. Specifically, C2 cells, coming from the most metabolically active area of the tumor (CNI+)  
501 previously shown to be more likely leading tumor relapse [58], in our hands also displayed higher  
502 ability to respond to an energetic demand (maximal respiration and spare respiratory capacity,  
503 Supplementary Fig.1C) compared with C1 cells. It is conceivable that the presence of metabolic  
504 heterogeneity may offer to GBM tumor cells adaptive mechanisms to better respond and overcome  
505 the cellular stress introduced by the treatments [59]. As C2 cells were shown to maintain their TNT-  
506 communicative ability after irradiation, differently from C1 cells, it is tempting to speculate that  
507 TNTs might contribute to this rescue process. However, the potential link between metabolism and  
508 ability to grow TNTs and to respond to treatment needs to be directly investigated by functional  
509 studies and in a large number of patient-derived cells. Furthermore, our data do not exclude that  
510 other mechanisms (including release of various extracellular factors as well as TMs) are involved in  
511 GBM therapy-resistance. TNT-mediated communication has been described to be an advantageous  
512 feature for tumoral cells in several cancer models [13], the ability to exploit this way of  
513 communication could be common in more aggressive cancer cells, also in the case of GBM. Overall,  
514 our data are consistent with tumor networking being important in GBM progression, resistance to  
515 treatment and relapse. In addition to TMs, the ability to grow functional TNTs could participate to  
516 the formation of a functional tumor network, where exchanges of organelles and different material  
517 in addition to signalling molecules is allowed (Fig.7). Although our data represent a step up to the  
518 use of GBM derived cell lines, it will be necessary to further investigate their relevance in a larger  
519 sample of tumors to specifically analyse the impact of TNT based networking in the context of tumor  
520 progression, therapy resistance and relapse. In this context, it may as well be possible to exploit  
521 them by considering inhibition of TNT-dependent transfer as a new way for optimization of  
522 radiotherapy efficacy in GBM.

523

524 **Conclusions**

525 Our data suggest that TNT-mediated exchange of cellular material occurs between GSCs and that in  
526 addition to TMs, TNTs participate to GBM tumoral networking providing a route for the transfer of  
527 intracellular material and potentially contributing to tumor progression and treatment-resistance.

528 **Abbreviation**

529 GBM: Glioblastoma

530 GSCs: Glioblastoma Stem Cells

531 GSLCs: Glioblastoma Stem-Like Cells

532 TNTs: Tunneling Nanotube

533 TMs: Tumor Microtube

534 Tub $\beta$ 3: Class III  $\beta$ -Tubulin

535 CHI3L3: Chitinase 3-Like-3

536 GFAP: Glial Fibrillary Acidic Protein

537 GAP43: Growth-Associated Protein 43

538 Olig1: Oligodendrocyte transcription factor 1

539 Olig2: Oligodendrocyte transcription factor 2

540 Sox2: Sex-determining-region-Y-Box Transcription Factor 2

541 Sox11: Sex-determining-region-Y-Box Transcription Factor 11

542 TOM20: Translocase of Outer Membrane

543 OCR: Oxygen consumption rate

544 FCCP: Carbonyl cyanide-4-(trifluoromethoxy) phenylhydrazine

545 **Declarations**

546

547 **Ethical approval:** The consent for the use of human material has been given with the clinical trial  
548 STEMRI (Identifier: NCT01872221).

549

550 **Consent for publication:** The consent for the use of human material has been given with the  
551 clinical trial STEMRI (Identifier: NCT01872221).

552

553 **Availability of data and materials:** The datasets used and/or analysed during the current study are  
554 available from the corresponding author on reasonable request.

555

556 **Competing interests:** The authors declare no conflict of interest

557

558 **Fundings:** This work was funded by grants from HTE (HTE201502) to CZ and EMJC, Institut National  
559 du Cancer (PLBIO18-103) to CZ and EMJC, Fondation de France (WB-2019-19194) to ISSM and  
560 Fondation ARC pour la recherche sur le cancer to GP (DOC20190508549).

561

562 **Acknowledgements:** We thank all the members of the MOGLIMAGING network, HTE program,  
563 Aviesan and INSERM which participated in our collaboration. We thank I. Leroux for teaching tumor  
564 organoids preparation and culture. We thank all the members of the UTRAF unit for their support.

565

566 **Authors' information:** Giulia Pinto<sup>1,2</sup> (giulia.pinto@pasteur.fr), Inés Saenz-de-Santa-Maria<sup>1</sup>  
567 (ines.saenz-de-santa-maria@pasteur.fr); Patricia Chastagner<sup>1</sup> (patricia.chastagner@pasteur.fr),  
568 Emeline Perthame<sup>3</sup> (emeline.perthame@pasteur.fr), Caroline Delmas<sup>4</sup> (Delmas.Caroline@iuct-  
569 oncopole.fr), Christine Toulas<sup>4</sup> (Toulas.Christine@iuct-oncopole.fr), Elizabeth Moyal-Jonathan-Cohen<sup>4</sup>  
570 (Moyal.Elizabeth@iuct-oncopole.fr), Christel Brou<sup>1</sup> (christel.brou@pasteur.fr), Chiara Zurzolo<sup>1</sup>  
571 (chiara.zurzolo@pasteur.fr).

572

## 573 References

- 574 1 Stupp, R., Mason, W. P., van den Bent, M. J., Weller, M., Fisher, B., Taphoorn, M. J. B., Belanger, K.,  
575 Brandes, A. A., Marosi, C., Bogdahn, U., et al. (2005) Radiotherapy plus concomitant and adjuvant  
576 temozolomide for glioblastoma. *N. Engl. J. Med.* **352**, 987–996.
- 577 2 Batash, R., Asna, N., Schaffer, P., Francis, N. and Schaffer, M. (2017) Glioblastoma Multiforme,  
578 Diagnosis and Treatment; Recent Literature Review. *Curr. Med. Chem.* **24**, 3002–3009.
- 579 3 Lathia, J. D., Mack, S. C., Mulkearns-Hubert, E. E., Valentim, C. L. L. and Rich, J. N. (2015) Cancer stem  
580 cells in glioblastoma. *Genes Dev* **29**, 1203–1217.
- 581 4 Prager, B. C., Bhargava, S., Mahadev, V., Hubert, C. G. and Rich, J. N. (2020) Glioblastoma Stem Cells:  
582 Driving Resilience through Chaos. *Trends Cancer* **6**, 223–235.
- 583 5 Bao, S., Wu, Q., McLendon, R. E., Hao, Y., Shi, Q., Hjelmeland, A. B., Dewhirst, M. W., Bigner, D. D. and  
584 Rich, J. N. (2006) Glioma stem cells promote radioresistance by preferential activation of the DNA  
585 damage response. *Nature*, Nature Publishing Group **444**, 756–760.
- 586 6 Suvà, M. L., Rheinbay, E., Gillespie, S. M., Patel, A. P., Wakimoto, H., Rabkin, S. D., Riggi, N., Chi, A. S.,  
587 Cahill, D. P., Nahed, B. V., et al. (2014) Reconstructing and reprogramming the tumor-propagating  
588 potential of glioblastoma stem-like cells. *Cell* **157**, 580–594.
- 589 7 Dahan, P., Martinez Gala, J., Delmas, C., Monferran, S., Malric, L., Zentkowski, D., Lubrano, V., Toulas,  
590 C., Cohen-Jonathan Moyal, E. and Lemarie, A. (2014) Ionizing radiations sustain glioblastoma cell  
591 dedifferentiation to a stem-like phenotype through survivin: possible involvement in radioresistance.  
592 *Cell Death Dis* **5**, e1543.
- 593 8 Broekman, M. L., Maas, S. L. N., Abels, E. R., Mempel, T. R., Krichevsky, A. M. and Breakefield, X. O.  
594 (2018) Multidimensional communication in the microenvirons of glioblastoma. *Nat Rev Neurol* **14**,  
595 482–495.
- 596 9 Asencio-Barría, C., Defamie, N., Sáez, J. C., Mesnil, M. and Godoy, A. S. (2019) Direct Intercellular  
597 Communications and Cancer: A Snapshot of the Biological Roles of Connexins in Prostate Cancer.  
598 *Cancers (Basel)* **11**.
- 599 10 Osswald, M., Jung, E., Sahm, F., Solecki, G., Venkataramani, V., Blaes, J., Weil, S., Horstmann, H.,  
600 Wiestler, B., Syed, M., et al. (2015) Brain tumour cells interconnect to a functional and resistant  
601 network. *Nature* **528**, 93–98.
- 602 11 Weil, S., Osswald, M., Solecki, G., Grosch, J., Jung, E., Lemke, D., Ratliff, M., Hänggi, D., Wick, W. and  
603 Winkler, F. (2017) Tumor microtubules convey resistance to surgical lesions and chemotherapy in  
604 gliomas. *Neuro-oncology* **19**, 1316–1326.
- 605 12 Jung, E., Osswald, M., Blaes, J., Wiestler, B., Sahm, F., Schmenger, T., Solecki, G., Deumelandt, K., Kurz,  
606 F. T., Xie, R., et al. (2017) Tweety-Homolog 1 Drives Brain Colonization of Gliomas. *J. Neurosci., Society*  
607 *for Neuroscience* **37**, 6837–6850.
- 608 13 Pinto, G., Brou, C. and Zurzolo, C. (2020) Tunneling Nanotubes: The Fuel of Tumor Progression? *Trends*  
609 *in Cancer* **6**, 874–888.
- 610 14 Hekmatshoar, Y., Nakhle, J., Galloni, M. and Vignais, M.-L. (2018) The role of metabolism and tunneling  
611 nanotube-mediated intercellular mitochondria exchange in cancer drug resistance. *Biochem. J.* **475**,  
612 2305–2328.
- 613 15 Rustom, A., Saffrich, R., Markovic, I., Walther, P. and Gerdes, H.-H. (2004) Nanotubular highways for  
614 intercellular organelle transport. *Science* **303**, 1007–1010.
- 615 16 Sartori-Rupp, A., Cordero Cervantes, D., Pepe, A., Gousset, K., Delage, E., Corroyer-Dulmont, S.,  
616 Schmitt, C., Krijnse-Locker, J. and Zurzolo, C. (2019) Correlative cryo-electron microscopy reveals the  
617 structure of TNTs in neuronal cells. *Nat Commun* **10**, 342.
- 618 17 Abounit, S. and Zurzolo, C. (2012) Wiring through tunneling nanotubes – from electrical signals to  
619 organelle transfer. *J Cell Sci* **125**, 1089–1098.
- 620 18 Abounit, S., Bousset, L., Loria, F., Zhu, S., de Chaumont, F., Pieri, L., Olivo-Marin, J.-C., Melki, R. and  
621 Zurzolo, C. (2016) Tunneling nanotubes spread fibrillar  $\alpha$ -synuclein by intercellular trafficking of  
622 lysosomes. *EMBO J.* **35**, 2120–2138.

- 623 19 Zhu, S., Victoria, G. S., Marzo, L., Ghosh, R. and Zurzolo, C. (2015) Prion aggregates transfer through  
624 tunneling nanotubes in endocytic vesicles. *Prion* **9**, 125–135.
- 625 20 Abounit, S., Wu, J. W., Duff, K., Victoria, G. S. and Zurzolo, C. (2016) Tunneling nanotubes: A possible  
626 highway in the spreading of tau and other prion-like proteins in neurodegenerative diseases. *Prion* **10**,  
627 344–351.
- 628 21 Victoria, G. S. and Zurzolo, C. (2015) Trafficking and degradation pathways in pathogenic conversion of  
629 prions and prion-like proteins in neurodegenerative diseases. *Virus Res.* **207**, 146–154.
- 630 22 Victoria, G. S. and Zurzolo, C. (2017) The spread of prion-like proteins by lysosomes and tunneling  
631 nanotubes: Implications for neurodegenerative diseases. *J. Cell Biol.* **216**, 2633–2644.
- 632 23 Onfelt, B., Nedvetzki, S., Benninger, R. K. P., Purbhoo, M. A., Sowinski, S., Hume, A. N., Seabra, M. C.,  
633 Neil, M. A. A., French, P. M. W. and Davis, D. M. (2006) Structurally distinct membrane nanotubes  
634 between human macrophages support long-distance vesicular traffic or surfing of bacteria. *J. Immunol.*  
635 **177**, 8476–8483.
- 636 24 Eugenin, E. A., Gaskill, P. J. and Berman, J. W. (2009) Tunneling nanotubes (TNT) are induced by HIV-  
637 infection of macrophages. *Cell Immunol* **254**, 142–148.
- 638 25 Souriant, S., Balboa, L., Dupont, M., Pingris, K., Kviatcovsky, D., Cougoule, C., Lastrucci, C., Bah, A.,  
639 Gasser, R., Poincloux, R., et al. (2019) Tuberculosis Exacerbates HIV-1 Infection through IL-10/STAT3-  
640 Dependent Tunneling Nanotube Formation in Macrophages. *Cell Rep* **26**, 3586-3599.e7.
- 641 26 Korenkova, O., Pepe, A. and Zurzolo, C. (2020) Fine intercellular connections in development: TNTs,  
642 cytonemes, or intercellular bridges? *Cell Stress* **4**, 30–43.
- 643 27 Vignais, M.-L., Caicedo, A., Brondello, J.-M. and Jorgensen, C. (2017) Cell Connections by Tunneling  
644 Nanotubes: Effects of Mitochondrial Trafficking on Target Cell Metabolism, Homeostasis, and Response  
645 to Therapy. *Stem Cells Int* **2017**, 6917941.
- 646 28 Carone, C., Genedani, S., Leo, G., Filafferro, M., Fuxe, K. and Agnati, L. F. (2015) In vitro effects of  
647 cocaine on tunneling nanotube formation and extracellular vesicle release in glioblastoma cell cultures.  
648 *J. Mol. Neurosci.* **55**, 42–50.
- 649 29 Ding, X., Ma, M., Teng, J., Teng, R. K. F., Zhou, S., Yin, J., Fonkem, E., Huang, J. H., Wu, E. and Wang, X.  
650 (2015) Exposure to ALS-FTD-CSF generates TDP-43 aggregates in glioblastoma cells through exosomes  
651 and TNTs-like structure. *Oncotarget* **6**, 24178–24191.
- 652 30 Formicola, B., D’Aloia, A., Dal Magro, R., Stucchi, S., Rigolio, R., Ceriani, M. and Re, F. (2019) Differential  
653 Exchange of Multifunctional Liposomes Between Glioblastoma Cells and Healthy Astrocytes via  
654 Tunneling Nanotubes. *Front. Bioeng. Biotechnol.* **7**.
- 655 31 Zhang, L. and Zhang, Y. (2015) Tunneling nanotubes between rat primary astrocytes and C6 glioma cells  
656 alter proliferation potential of glioma cells. *Neurosci Bull* **31**, 371–378.
- 657 32 Valdebenito, S., Audia, A., Bhat, K. P. L., Okafo, G. and Eugenin, E. A. (2020) Tunneling Nanotubes  
658 Mediate Adaptation of Glioblastoma Cells to Temozolomide and Ionizing Radiation Treatment. *iScience*  
659 **23**, 101450.
- 660 33 Avril, T., Vauleon, E., Hamlat, A., Saikali, S., Etcheverry, A., Delmas, C., Diabira, S., Mosser, J., Quillien,  
661 V. Human Glioblastoma Stem-Like Cells are More Sensitive to Allogeneic NK and T Cell-Mediated Killing  
662 Compared with Serum-Cultured Glioblastoma Cells - Avril - 2012 - Brain Pathology - Wiley Online  
663 Library.
- 664 34 Hubert, C. G., Rivera, M., Spangler, L. C., Wu, Q., Mack, S. C., Prager, B. C., Couce, M., McLendon, R. E.,  
665 Sloan, A. E. and Rich, J. N. (2016) A Three-Dimensional Organoid Culture System Derived from Human  
666 Glioblastomas Recapitulates the Hypoxic Gradients and Cancer Stem Cell Heterogeneity of Tumors  
667 Found In Vivo. *Cancer Res.* **76**, 2465–2477.
- 668 35 Abounit, S., Delage, E. and Zurzolo, C. (2015) Identification and Characterization of Tunneling  
669 Nanotubes for Intercellular Trafficking. *Curr Protoc Cell Biol* **67**, 12.10.1-21.
- 670 36 Ferrick, D. A., Neilson, A. and Beeson, C. (2008) Advances in measuring cellular bioenergetics using  
671 extracellular flux. *Drug Discovery Today* **13**, 268–274.
- 672 37 Bates, D., Mächler, M., Bolker, B. and Walker, S. (2015) Fitting Linear Mixed-Effects Models Using lme4.  
673 *Journal of Statistical Software* **67**, 1–48.



- 674 38 Kuznetsova, A., Brockhoff, P. B. and Christensen, R. H. B. (2017) lmerTest Package: Tests in Linear  
675 Mixed Effects Models. *Journal of Statistical Software* **82**, 1–26.
- 676 39 Deviers, A., Ken, S., Filleron, T., Rowland, B., Laruelo, A., Catalaa, I., Lubrano, V., Celsis, P., Berry, I.,  
677 Mogenicato, G., et al. (2014) Evaluation of the lactate-to-N-acetyl-aspartate ratio defined with magnetic  
678 resonance spectroscopic imaging before radiation therapy as a new predictive marker of the site of  
679 relapse in patients with glioblastoma multiforme. *Int. J. Radiat. Oncol. Biol. Phys.* **90**, 385–393.
- 680 40 Guo, J., Yao, C., Chen, H., Zhuang, D., Tang, W., Ren, G., Wang, Y., Wu, J., Huang, F. and Zhou, L. (2012)  
681 The relationship between Cho/NAA and glioma metabolism: implementation for margin delineation of  
682 cerebral gliomas. *Acta Neurochir (Wien)* **154**, 1361–1370.
- 683 41 Neftel, C., Laffy, J., Filbin, M. G., Hara, T., Shore, M. E., Rahme, G. J., Richman, A. R., Silverbush, D.,  
684 Shaw, M. L., Hebert, C. M., et al. (2019) An Integrative Model of Cellular States, Plasticity, and Genetics  
685 for Glioblastoma. *Cell* **178**, 835–849.e21.
- 686 42 Singh, S. K., Hawkins, C., Clarke, I. D., Squire, J. A., Bayani, J., Hide, T., Henkelman, R. M., Cusimano, M.  
687 D. and Dirks, P. B. (2004) Identification of human brain tumour initiating cells. *Nature* **432**, 396–401.
- 688 43 Son, M. J., Woolard, K., Nam, D.-H., Lee, J. and Fine, H. A. (2009) SSEA-1 is an enrichment marker for  
689 tumor-initiating cells in human glioblastoma. *Cell Stem Cell* **4**, 440–452.
- 690 44 Verhaak, R. G. W., Hoadley, K. A., Purdom, E., Wang, V., Qi, Y., Wilkerson, M. D., Miller, C. R., Ding, L.,  
691 Golub, T., Mesirov, J. P., et al. (2010) Integrated genomic analysis identifies clinically relevant subtypes  
692 of glioblastoma characterized by abnormalities in PDGFRA, IDH1, EGFR, and NF1. *Cancer Cell* **17**, 98–  
693 110.
- 694 45 Lee, J., Kotliarova, S., Kotliarov, Y., Li, A., Su, Q., Donin, N. M., Pastorino, S., Purow, B. W., Christopher,  
695 N., Zhang, W., et al. (2006) Tumor stem cells derived from glioblastomas cultured in bFGF and EGF  
696 more closely mirror the phenotype and genotype of primary tumors than do serum-cultured cell lines.  
697 *Cancer Cell* **9**, 391–403.
- 698 46 Zhu, S., Bhat, S., Syan, S., Kuchitsu, Y., Fukuda, M. and Zurzolo, C. (2018) Rab11a-Rab8a cascade  
699 regulates the formation of tunneling nanotubes through vesicle recycling. *J. Cell. Sci.* **131**.
- 700 47 Osswald, M., Jung, E., Wick, W. and Winkler, F. (2019) Tunneling nanotube-like structures in brain  
701 tumors. *CANCER REPORTS* **2**, e1181.
- 702 48 Civita, P., M. Leite, D. and Pilkington, G. J. (2019) Pre-Clinical Drug Testing in 2D and 3D Human In Vitro  
703 Models of Glioblastoma Incorporating Non-Neoplastic Astrocytes: Tunneling Nano Tubules and  
704 Mitochondrial Transfer Modulates Cell Behavior and Therapeutic Respons. *International Journal of*  
705 *Molecular Sciences* **20**, 6017.
- 706 49 Linkous, A., Balamatsias, D., Snuderl, M., Edwards, L., Miyaguchi, K., Milner, T., Reich, B., Cohen-Gould,  
707 L., Storaska, A., Nakayama, Y., et al. (2019) Modeling Patient-Derived Glioblastoma with Cerebral  
708 Organoids. *Cell Reports* **26**, 3203–3211.e5.
- 709 50 Jung, E., Alfonso, J., Osswald, M., Monyer, H., Wick, W. and Winkler, F. (2019) Emerging intersections  
710 between neuroscience and glioma biology. *Nature Neuroscience* **22**, 1951–1960.
- 711 51 Venkataramani, V., Tanev, D. I., Strahle, C., Studier-Fischer, A., Fankhauser, L., Kessler, T., Körber, C.,  
712 Kardorff, M., Ratliff, M., Xie, R., et al. (2019) Glutamatergic synaptic input to glioma cells drives brain  
713 tumour progression. *Nature* **573**, 532–538.
- 714 52 Venkatesh, H. S., Morishita, W., Geraghty, A. C., Silverbush, D., Gillespie, S. M., Arzt, M., Tam, L. T.,  
715 Espenel, C., Ponnuswami, A., Ni, L., et al. (2019) Electrical and synaptic integration of glioma into neural  
716 circuits. *Nature* **573**, 539–545.
- 717 53 Osswald, M., Solecki, G., Wick, W. and Winkler, F. (2016) A malignant cellular network in gliomas:  
718 potential clinical implications. *Neuro-oncology* **18**, 479–485.
- 719 54 Wang, X., Yu, X., Xie, C., Tan, Z., Tian, Q., Zhu, D., Liu, M. and Guan, Y. (2016) Rescue of Brain Function  
720 Using Tunneling Nanotubes Between Neural Stem Cells and Brain Microvascular Endothelial Cells. *Mol.*  
721 *Neurobiol.* **53**, 2480–2488.
- 722 55 Kretschmer, A., Zhang, F., Somasekharan, S. P., Tse, C., Leachman, L., Gleave, A., Li, B., Asmaro, I.,  
723 Huang, T., Kotula, L., et al. (2019) Stress-induced tunneling nanotubes support treatment adaptation in  
724 prostate cancer. *Sci Rep* **9**.

- 725 56 Desir, S., Wong, P., Turbyville, T., Chen, D., Shetty, M., Clark, C., Zhai, E., Romin, Y., Manova-Todorova,  
726 K., Starr, T. K., et al. (2019) Intercellular Transfer of Oncogenic KRAS via Tunneling Nanotubes  
727 Introduces Intracellular Mutational Heterogeneity in Colon Cancer Cells. *Cancers (Basel)* **11**.  
728 57 Connor, Y., Tekleab, S., Nandakumar, S., Walls, C., Tekleab, Y., Husain, A., Gadish, O., Sabbisetti, V.,  
729 Kaushik, S., Sehrawat, S., et al. (2015) Physical nanoscale conduit-mediated communication between  
730 tumour cells and the endothelium modulates endothelial phenotype. *Nature Communications* **6**, 8671.  
731 58 Laprie, A., Catalaa, I., Cassol, E., McKnight, T. R., Berchery, D., Marre, D., Bachaud, J.-M., Berry, I. and  
732 Moyal, E. C.-J. (2008) Proton Magnetic Resonance Spectroscopic Imaging in Newly Diagnosed  
733 Glioblastoma: Predictive Value for the Site of Postradiotherapy Relapse in a Prospective Longitudinal  
734 Study. *International Journal of Radiation Oncology\*Biophysics* **70**, 773–781.  
735 59 Badr, C. E., Silver, D. J., Siebzehnruhl, F. A. and Deleyrolle, L. P. (2020) Metabolic heterogeneity and  
736 adaptability in brain tumors. *Cell Mol Life Sci* **77**, 5101–5119.

737

738

739 **Figure legends**

740

741 **Figure 1. GSLCs form TNT-like structures.** (A) MRI analysis of C patient glioblastoma. The tumor is  
742 composed by a compact cellular part defined 'Tumor core', identified by MRI T1-Gadolinium (on the  
743 left). Some tumoral cells infiltrate the normal tissue, forming the 'Infiltrative zone' which is identified  
744 by MRI-FLAIR (right picture and schematics). C1 and C2 cells were obtained from different parts of  
745 the infiltrative zone (see Supplementary Figure 1). (B) C1 and C2 cell growth, forming neurosphere-  
746 like clusters in suspension. The resulting images represents a Z-projection of 30 and 50 slides (step  
747 size: 0.5  $\mu\text{m}$ ), respectively, acquired in Bright field using 40X magnification. Scale bar = 10  $\mu\text{m}$ . (C)  
748 Expression of differentiation and progenitor/stem cells markers in C1 and C2, respectively in green  
749 and orange. The relative gene expressions were quantified by RT-qPCR after RNA extraction. Data  
750 were normalized over the expression of HPRT, housekeeping gene. GFAP and CHI3L1 showed no  
751 expression in both C1 and C2 and are not represented on the graph. The graph represents the means  
752 with SD of 5 independent experiments, each point performed in triplicate. P values > 0.05 are not  
753 significant and not indicated on the figure. (D) GSLCs connected by TNT in live imaging in 2D culture.  
754 Cells were seeded on laminin-coated plates and pictures were taken after 6h of seeding using  
755 60  $\times$  1.4NA CSU oil immersion objective lens using Bright field. Arrowheads point to TNT-like  
756 connections. Scale bar = 20  $\mu\text{m}$ . (E) GSLC TNTs containing actin but not microtubules. Cells were  
757 plated on laminin-coated surface for 6 hours, fixed and stained with phalloidin (actin filaments, red),  
758 anti- $\alpha$ Tubulin (microtubules, green) and DAPI (nuclei, blue). Representative images were acquired  
759 showing TNTs, actin-positive and  $\alpha$ Tubulin-devoid, floating above the dish surface. White-filled  
760 arrowhead indicates presence of TNT labelling, dashed arrowhead indicated absence of TNT  
761 staining. Scale bar = 10  $\mu\text{m}$ . (F) Quantification of TNT-connected cells in C1 and C2, respectively in  
762 green and orange. GSLC were plated on laminin-coated surface, fixed after 6h and stained with  
763 WGA. 2x2 tiles images were acquired with 60x objective and analysed by Icy software. C1 were  
764 forming 9.0 $\pm$ 4% of connecting cells (5 independent experiments each performed in duplicates, total  
765 n cells counted=1239), while C2 were forming 14.4 $\pm$ 7% (4 independent experiments, each  
766 performed in duplicates, total n cells counted=1367), significantly more connected cells than C1  
767 (p=0.0370). Each dot represents an image containing an average of 40 cells each. P-values were  
768 deduced from contrast comparing the two cell populations in a logistic regression model. Error bar  
769 = standard deviation. P value < 0.05 (\*).

770

771 **Figure 2. GSLCs transfer mitochondria through TNTs.** (A) C2 expressing MitoGFP are connected by  
772 TNTs containing mitochondria. Cells were seeded on laminin-coated dish and after 6 hours video  
773 were acquired using Bright field and laser 488 in a Spinning Disk microscope. Timeframes show the  
774 mitochondria moving along the connection and entering in one of the two connected cells. Each  
775 timeframe of the video is the result of the Z-projection of 18 slides (step size: 0.5  $\mu\text{m}$ ) (B) Schematic  
776 representation of the coculture experiment. Donor MitoGFP cells were co-cultured with acceptor  
777 mCherry cells at 1:1 ratio either by direct contact or through a 1  $\mu\text{m}$  filter. (C) Representative flow  
778 cytometry plot of C2 after 5 days of coculture. Acceptor and donor cells respectively lie on the X and  
779 Y axis. Acceptor cells positive for MitoGFP signal are framed in the red boxes. (D) Quantification by  
780 flow cytometry of the mitochondria transfer over time in C1 and C2, respectively in green and  
781 orange. A minimum of 10000 events were analyzed after 2 or 5 days of coculture. C1 shows  
782  $0.38\pm 0.27\%$  and  $1.01\pm 0.33\%$  of acceptor cells receiving mitochondria after 2 and 5 days, respectively  
783 (4 independent experiments, each performed in duplicate). C2 shows  $1.25\pm 0.63\%$  and  $2.33\pm 0.95\%$   
784 of acceptor cells receiving mitochondria after 2 and 5 days, respectively (5 independent  
785 experiments, each performed in duplicate), significantly more than C1 ( $p < 0.0001$  (\*\*\*\*) at day 2,  
786  $p = 0.0085$  (\*\*)) at day 5). P-values were deduced from contrast comparing the two cell populations  
787 in a logistic regression model. Error bar = SD (E) Cell growth in co-culture experiment. 80000 GSLCs  
788 per well were plated at time 0 and counted after co-culture. For C1,  $158000\pm 28751$  and  
789  $568866\pm 85332$  cells were counted after 2 and 5 days, respectively (3 independent experiments). For  
790 C2,  $182900\pm 61890$  and  $505260\pm 77515$  cells were counted after 2 and 5 days, respectively (5  
791 independent experiments). Error bar = SD. ANOVA two-way test was performed and showed no  
792 significant difference between C1 and C2 at the two timepoint in analyse. (F) Representative image  
793 of co-culture assay in C2. Donor MitoGFP (in green) and acceptor mCherry cells (in red) were fixed  
794 after 5 days of co-culture, confocal images were acquired with 63x objective. In the magnification,  
795 the orthogonal view of an acceptor cell containing donor-derived mitochondria. Scale bar = 10  $\mu\text{m}$ .

796

797 **Figure 3. GSLCs in tumor organoids.** (A) Image of C2 tumor organoid at 2 and 13 days of growth  
798 using Pln-Apo 10X/0.45 objective of inverted confocal LSM700. The resulting images represent a  
799 max intensity projection of 5 and 31 sections (step size: 7 and 3.12 $\mu\text{m}$ ), respectively, stained for  
800 anti- $\alpha$ Tubulin (microtubules, white), Phalloidin (actin in red) and nuclei (blue). Scale bars are 200  
801 (top) and 500  $\mu\text{m}$  (bottom). (B) Expression of differentiation and progenitor/stem cells markers in  
802 C1 and C2 organoids, respectively in green and orange. The relative gene expressions were

803 quantified by RT-qPCR after RNA extraction from 23-days-old organoids, normalized over the  
804 expression of HPRT. Note the 12-fold increased expression of GAP43 in C2 tumor organoids, and  
805 GFAP and CHI3L1 show no expression in both conditions and are not represented on the graph. The  
806 graphs represent means with SD of 3 and 4 independent experiments for C1 and C2 respectively,  
807 each point performed in triplicate. Holm-Sidak method was applied to determine statistical  
808 significance between cells and organoids for each gene. P value < 0.05 (\*), P values > 0.05 are not  
809 significant and not indicated on the figure. (C) C1 and C2 tumor organoids at 9 and 6 days,  
810 respectively, stained for anti- $\alpha$ Tubulin (microtubules, green), Phalloidin (actin filaments, red), and  
811 nuclei (blue). Confocal images were acquired with 40X objective. Region of interest show either  
812  $\alpha$ Tubulin-devoid connections, defined as TNT-like (<1  $\mu$ m), or thick  $\alpha$ Tubulin-positive connections  
813 (>1  $\mu$ m), named TM-like. Dashed arrowheads indicate absence of fluorescent signal at the  
814 connection level, white-filled arrowhead show positiveness to the signal. Both images are max  
815 intensity projections of 12 slices (step size: 0.38  $\mu$ m). Scale bar = 10  $\mu$ m.

816 **Figure 4. Mitochondria transfer in tumor organoids.** (A) TNT-like connection between C2 cells  
817 containing mitochondria in 6-days old tumor organoids. Timeframes result of the max projection of  
818 62 slides (step size: 0.5 $\mu$ m) with a total physical thickness of 31 $\mu$ m, with 1 minute of interval time.  
819 White arrows point to the mitochondria movement inside the TNT at the different time points.  
820 Video were acquired using Bright field and laser 488 in a Spinning Disk microscope. (B)  
821 Quantification of the mitochondria transfer in tumor organoids over time in C1 and C2, respectively  
822 in green and orange. Organoids were prepared mixing donor and acceptor cells for each GSLC. For  
823 each timepoint and condition, duplicates of a pool of 3 organoids were dissociated in a single cell  
824 suspension and fixed for flow cytometry analysis after 6, 9, 13, 16, 20 and 23 days of culture. All the  
825 cells in the suspension were analyzed to obtain the percentage of acceptor cells receiving  
826 mitochondria. C1: day 6 1.54 $\pm$ 1.4%; day 9 2.80 $\pm$ 2.9%; day 13 2.20 $\pm$ 1.1%; day 16 5.07 $\pm$ 2.06%; day 20  
827 3.55 $\pm$ 1.5%; day 23 3.05 $\pm$ 0.84% (4 independent experiments). C2: day 6 1.72 $\pm$ 0.7%; day 9 2.64 $\pm$ 2.2%;  
828 day 13 4.96 $\pm$ 4.35%; day 16 5.98 $\pm$ 1.02%; day 20 5.57 $\pm$ 0.03%; day 23 8.37 $\pm$ 2.7% (3 independent  
829 experiments). Percentage of transfer was transformed into a logarithmic scale. Error bar = SD. P-  
830 values are deduced by comparing the slopes of the two cellular population in a logistic regression  
831 model as described in material and methods. P value < 0.0001 (\*\*\*\*) (C) Cell number in tumor  
832 organoids. For each timepoint and condition, duplicates of a pool of 3 organoids were dissociated  
833 in a single cell suspension C1: day 6 24800 $\pm$ 5768; day 9 63150 $\pm$ 18350; day 13 105850 $\pm$ 43970; day  
834 16 140450 $\pm$ 33929; day 20 158600 $\pm$ 60394 day 23 181800 $\pm$ 78820 (4 independent experiments). C2:

835 day 6  $22600 \pm 3704$ ; day 9  $49700 \pm 8116$ ; day 13  $104200 \pm 33870$ ; day 16  $108580 \pm 42218$ ; day 20  
836  $128800 \pm 34478$ ; day 23  $145080 \pm 47726$  (4 independent experiments). The cell number was  
837 transformed into a logarithmic scale and slopes were compared by linear regression (dashed lines).  
838 No significant difference was observed between C1 and C2.

839

840 **Figure 5. GAP43 expression and TM characterization in tumor organoids of GSLC cells.** (A) GAP43  
841 protein expression increases over time. 2, 6 and 13 days-old organoids were fixed and stained with  
842 anti-GAP43 (in green) and DAPI (in blue). Confocal images with 10x objective were acquired. Images  
843 result from the max intensity projection of 5, 20, 11 sections (step size: 7, 3.13, 3.13  $\mu\text{m}$ ),  
844 respectively. Scale bars: 500  $\mu\text{m}$ , 200  $\mu\text{m}$ , 200  $\mu\text{m}$  (from left to right). (B) Heterogeneous expression  
845 of GAP43 in C2 tumor organoids. 6 days-old C2 organoids were fixed and stained with anti-GAP43  
846 (in green), phalloidin (actin filaments, in red) and DAPI (in blue). Confocal images with 63x objective  
847 were acquired. 3D reconstruction of a 50-sections image (step size: 0.33  $\mu\text{m}$ ) was performed using  
848 Imaris Viewer software. White-filled arrowhead point to a cluster of cells expressing GAP43,  
849 alternatively a group of cells negative for its expression are indicated with a dashed arrowhead.  
850 Scale bar: 5  $\mu\text{m}$ . (C) TM-like protrusion can express GAP43 in C2 organoids. 6 days-old C2 organoids  
851 were fixed and stained with anti-GAP43 (in green), phalloidin (actin filaments, in red) and DAPI (in  
852 blue). Confocal images with 63x objective were acquired. 3D reconstruction of a 77-sections image  
853 (step size: 0.77  $\mu\text{m}$ ) was performed using Imaris Viewer software. White-filled arrowheads point  
854 toward a TM-like extension expressing GAP43. Scale bar: 15  $\mu\text{m}$ . 3D reconstructions were  
855 performed with Imaris Software.

856

857 **Figure 6. Effect of GSLC irradiation on TNT-based communication.** (A) Quantification of TNT-  
858 connected cells in C1 and C2 after irradiation, respectively in green and orange, in adherent cell  
859 culture. GSLCs were irradiated 1 day before cell plating on laminin-coated surface, then fixed after  
860 6h and stained with WGA. 2x2 tiles images were acquired with 60x objective and analysed by Icy  
861 software, experimental duplicates were performed for each condition. The graphs represent means  
862 with SD. C1 were forming  $7.8 \pm 5\%$  (4 independent experiments, tot n cells counted=891),  $4.1 \pm 6\%$  (3  
863 independent experiments, total n cells counted=300) and  $7.7 \pm 7\%$  (3 independent experiments, total  
864 n cells counted=313) of connecting cells after 1, 3 and 6 days from the irradiation, respectively. No  
865 statistically significant difference was observed compared to control ( $9.0 \pm 4\%$ , 5 independent

866 experiments, total n cells counted=1239). C2 were forming  $20.8\pm 7\%$  (4 independent experiments,  
867 total n cells counted=1368),  $17.3\pm 7\%$  (3 independent experiments, total n cell counted=552) and  
868  $18.7\pm 8\%$  (3 independent experiments, total n cells counted=462) of connecting cells after 1, 3 and  
869 6 days from the irradiation, respectively. A statistically significant increase was observed 1 day after  
870 irradiation compared to control ( $14.4\pm 7\%$ , 4 independent experiments, total n cells counted=1367,  
871  $p=0.0073$  (\*\*)). Each dot represents an image containing an average of 40 cells each. P-values were  
872 deduced from contrast comparing the two cell populations in a logistic regression model. (B)  
873 Quantification of the mitochondria transfer by flow cytometry in both GSLCs over time in C1 and C2  
874 upon irradiation, respectively in green and orange. Donor GSLC were irradiated 1 day before the co-  
875 culture, analysis was performed after 2 or 5 days (corresponding at 3 and 6 days from the  
876 irradiation). A minimum of 10000 events were analyzed per condition, each performed in duplicate.  
877 In irradiated condition, C1 show  $0.48\pm 0.28\%$  and  $0.81\pm 0.18\%$  of acceptor cells receiving  
878 mitochondria after 2 and 5 days, respectively (4 independent experiments). No statistically  
879 significant difference was observed compared to control (day 2:  $0.38\pm 0.27\%$ ; day 5  $1.01\pm 0.33\%$ ; 4  
880 independent experiments). In irradiated condition, C2 show  $1.54\pm 0.73\%$  and  $2.74\pm 1.13\%$  of  
881 acceptor cells receiving mitochondria after 2 and 5 days, respectively (5 independent experiments).  
882 No statistically significant difference was observed compared to control (day 2:  $1.25\pm 0.63\%$ ; day 5:  
883  $2.33\pm 0.95\%$ . 5 independent experiments). P-values were deduced from contrast comparing the two  
884 cell populations in a logistic regression model. Graphs are means with SD. (C) Quantification of the  
885 mitochondria transfer in tumor organoids upon irradiation in C1 and C2, respectively in green and  
886 orange. Organoids were prepared mixing donor and acceptor cells for each GSLC and irradiated at  
887 5 days from their preparation. Experiment was performed as in Fig 4D. Control C1: day 6  $1.54\pm 1.4\%$ ;  
888 day 9  $2.80\pm 2.9\%$ ; day 13  $2.20\pm 1.1\%$ ; day 16  $5.07\pm 2.06\%$ ; day 20  $3.55\pm 1.5\%$ ; day 23  $3.05\pm 0.84\%$ .  
889 Irradiated C1: day 6  $1.90\pm 1.6\%$ ; day 9  $4.45\pm 1.9\%$ ; day 13  $2.50\pm 1.7\%$ ; day 16  $2.82\pm 1.5\%$ ; day 20  
890  $2.39\pm 1.61\%$ ; day 23  $1.76\pm 1.2\%$  (4 independent experiments,  $p<0.0001$ , \*\*\*\*). Control C2: day 6  
891  $1.72\pm 0.7\%$ ; day 9  $2.64\pm 2.2\%$ ; day 13  $4.96\pm 4.35\%$ ; day 16  $5.98\pm 1.02\%$ ; day 20  $5.57\pm 0.03\%$ ; day 23  
892  $8.37\pm 2.7\%$ . Irradiated C2: day 6  $1.23\pm 0.2\%$ ; day 9  $3.50\pm 2.3\%$ ; day 13  $3.03\pm 0.9\%$ ; day 16  $5.46\pm 1.5\%$ ;  
893 day 20  $4.23\pm 1.3\%$ ; day 23  $7.21\pm 1.7\%$  (3 independent experiments,  $p = 0.0665$ ). Percentage of  
894 transfer was transformed into a logarithmic scale. P-values are deduced by comparing the slopes of  
895 the two cellular population in a logistic regression model as described in material and methods.  
896 Error bar = SD.

897

898 **Figure 7. GSLC network.** GSLCs interconnect through different types of cellular extensions. TMs are  
899 thick ( $>1\mu\text{m}$ ) protrusions that can either contact other cells through GAP-junctions, allowing the  
900 propagation of calcium flux, or be individual finger-like extensions not connecting remote cells. They  
901 can be positive for GAP43 (rectangles along the membranes of TM), neuronal Growth-Associated  
902 Protein. GSLCs also interconnect through TNTs, thinner ( $<1\mu\text{m}$ ), open-ended connections which  
903 allow transfer of cellular cargos, such as mitochondria (ovals in TNTs).



# Figure 1

A

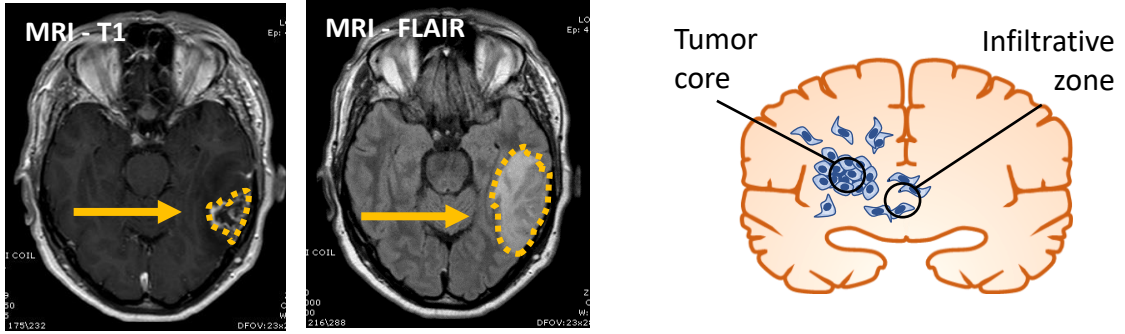

B

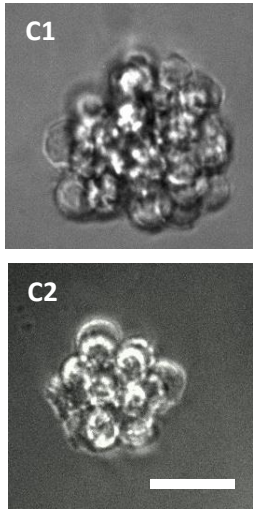

C

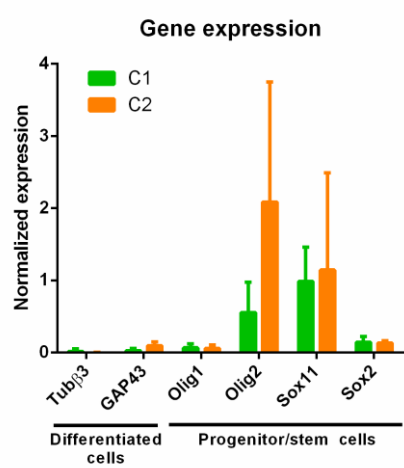

D

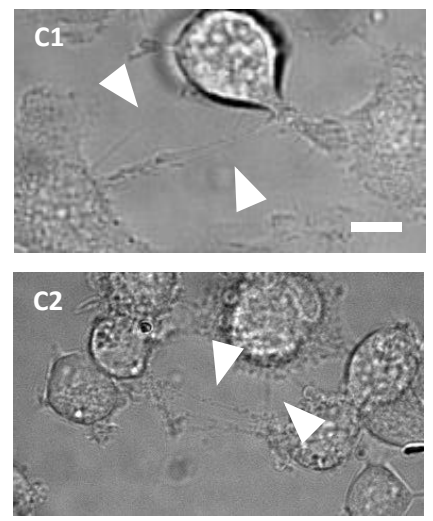

E

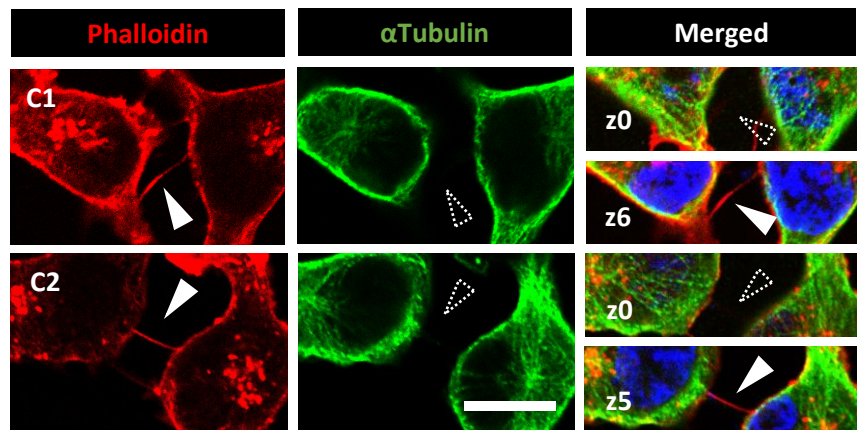

F

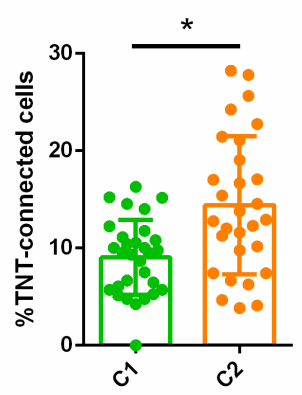

# Figure 2

A

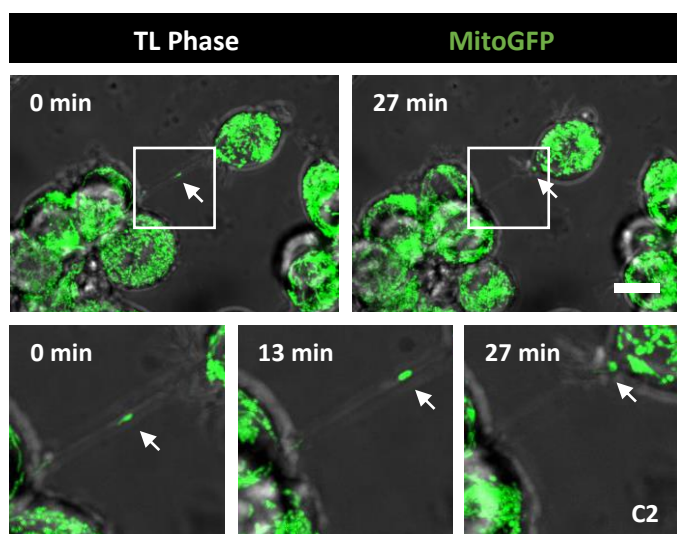

B

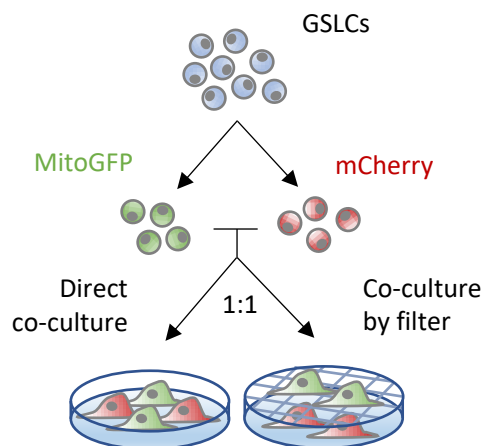

C

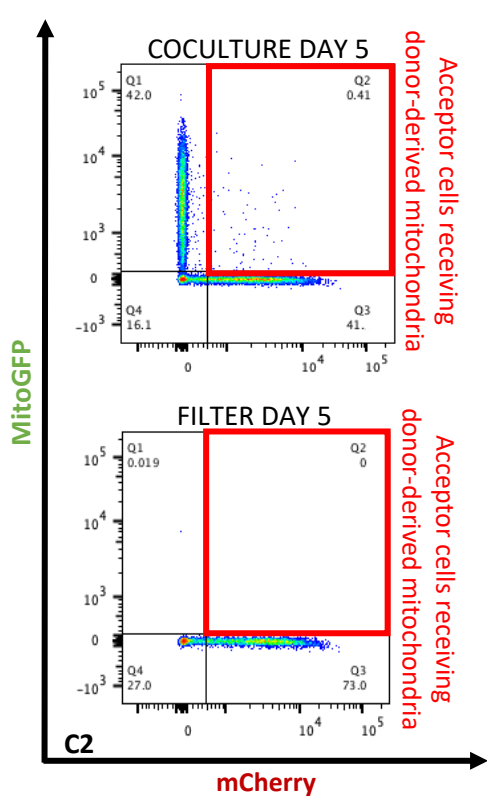

D

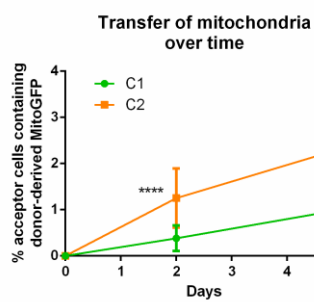

E

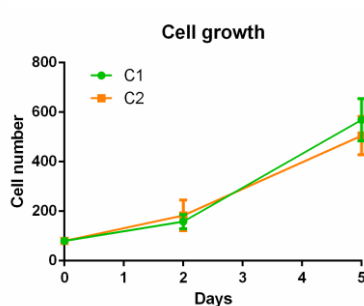

F

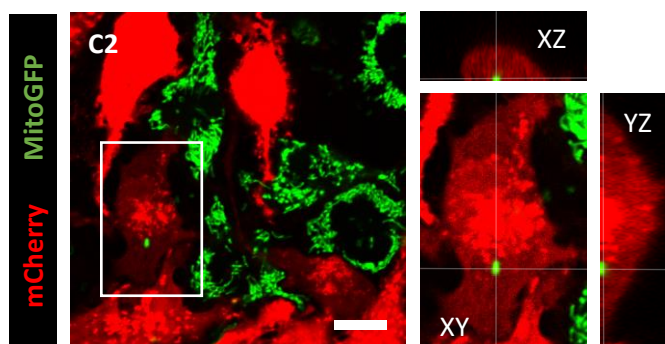

# Figure 3

A

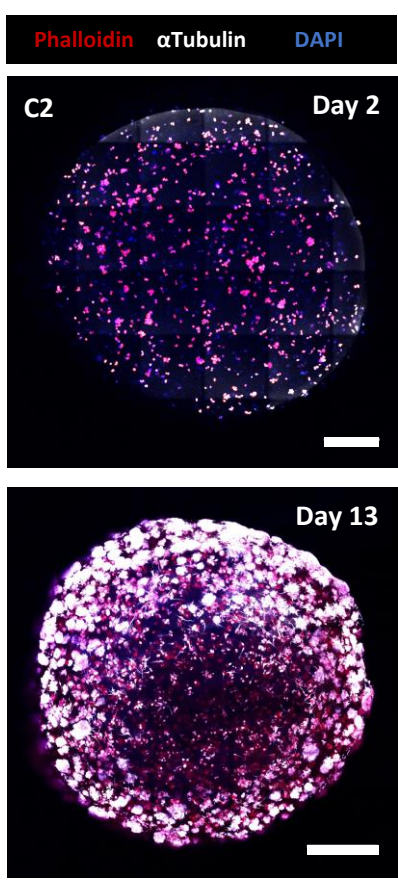

C

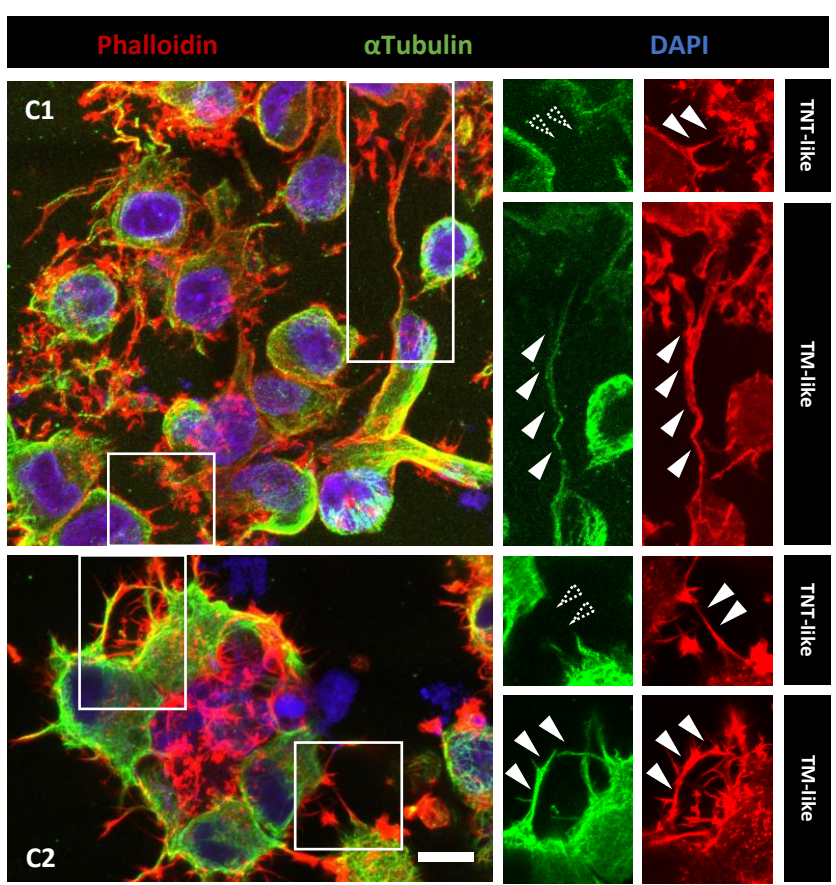

B

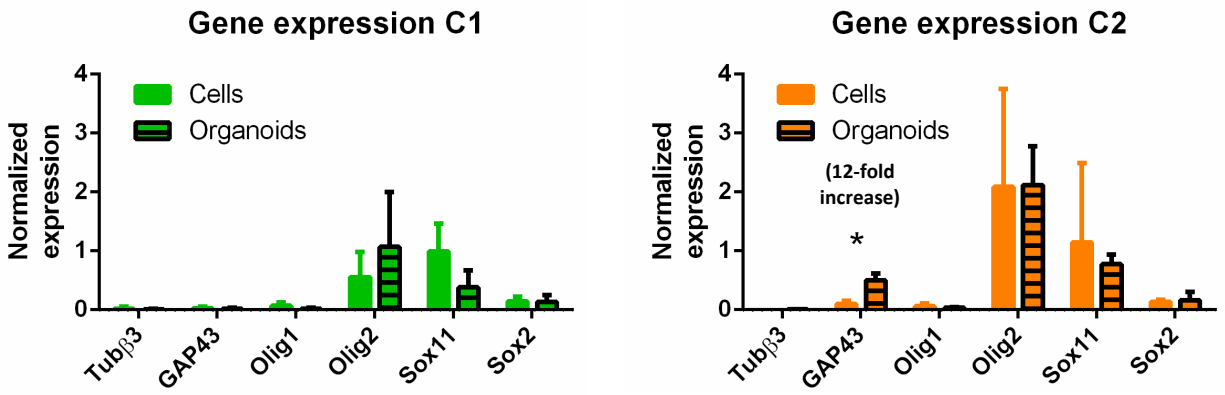

# Figure 4

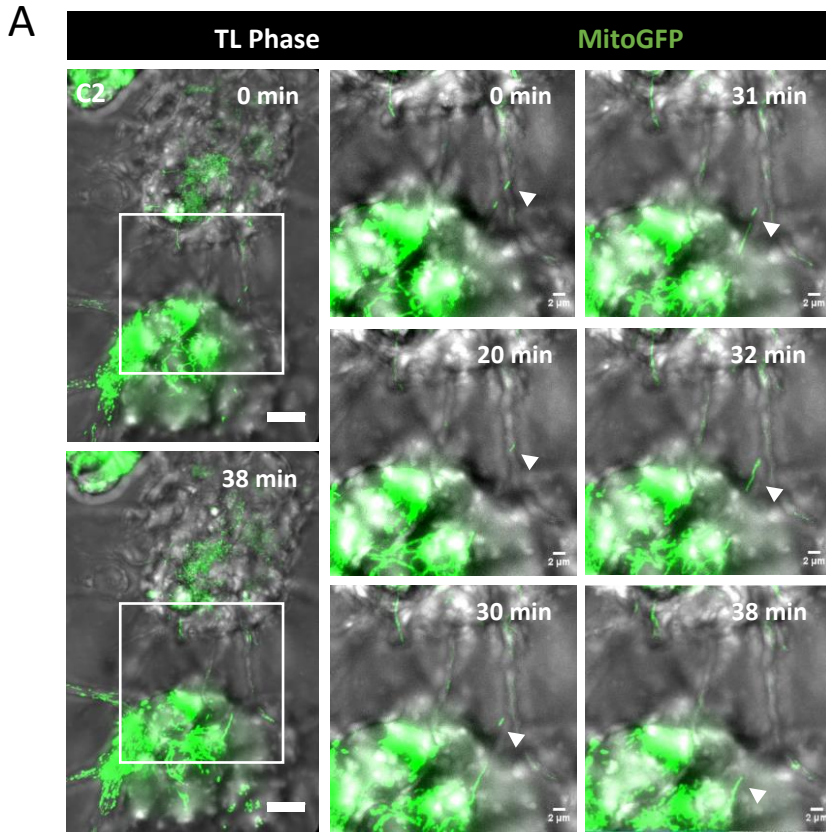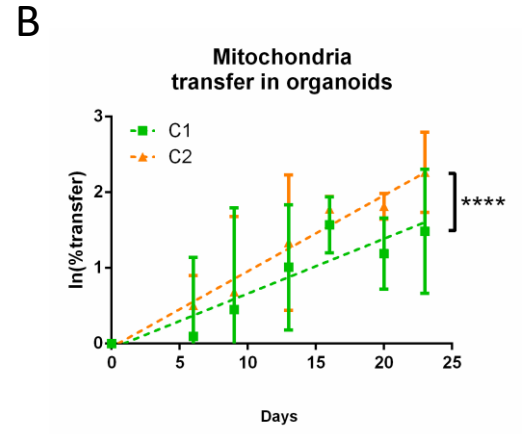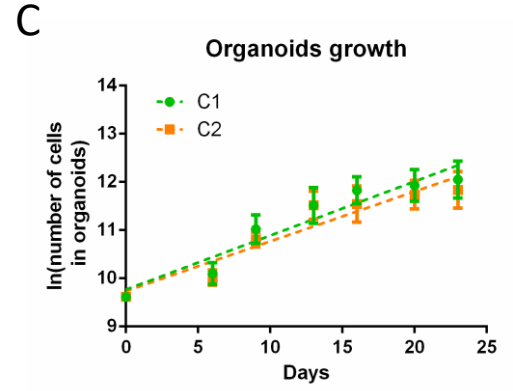

# Figure 5

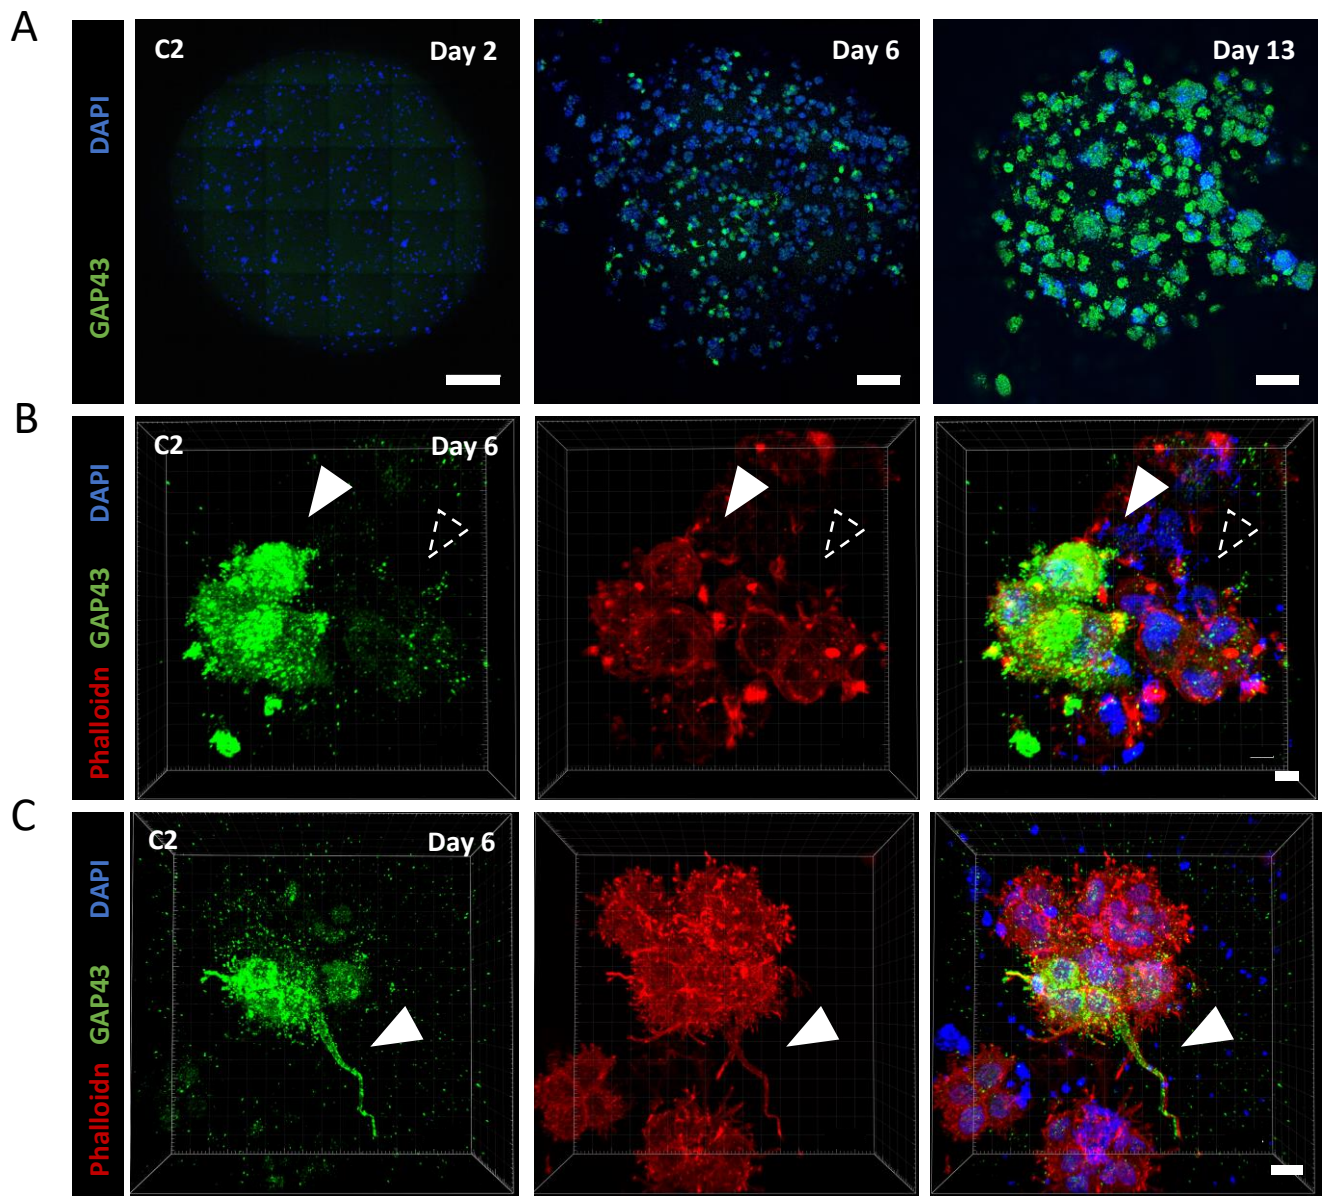

# Figure 6

A

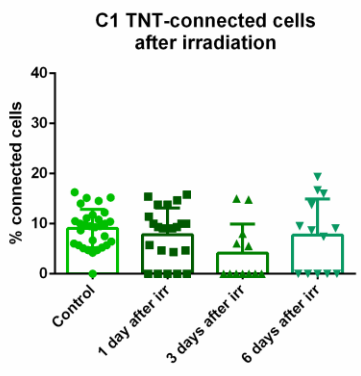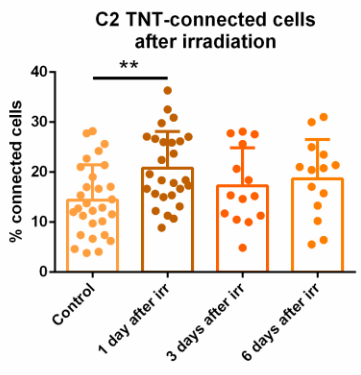

B

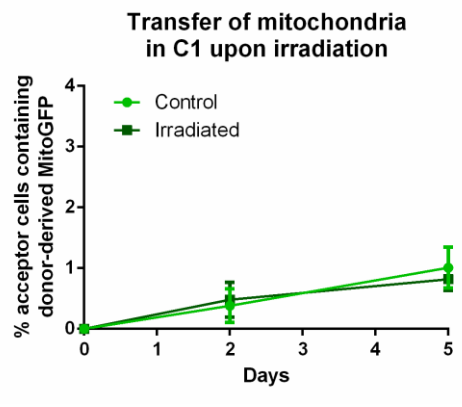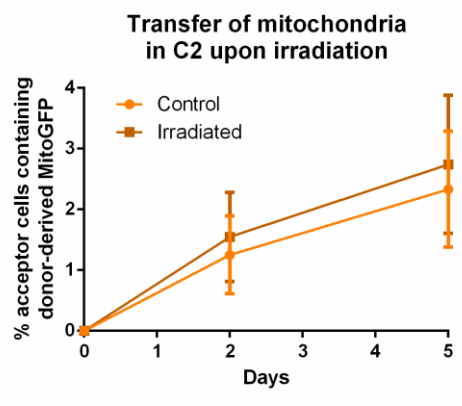

C

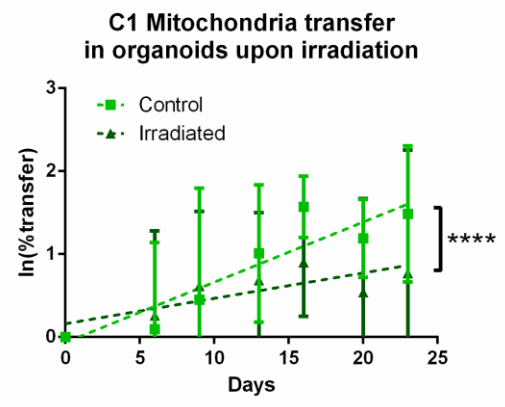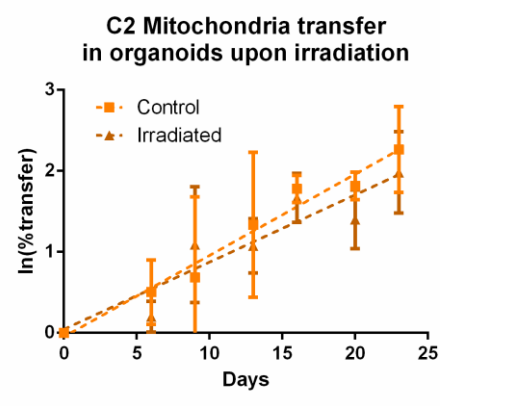

Figure 7

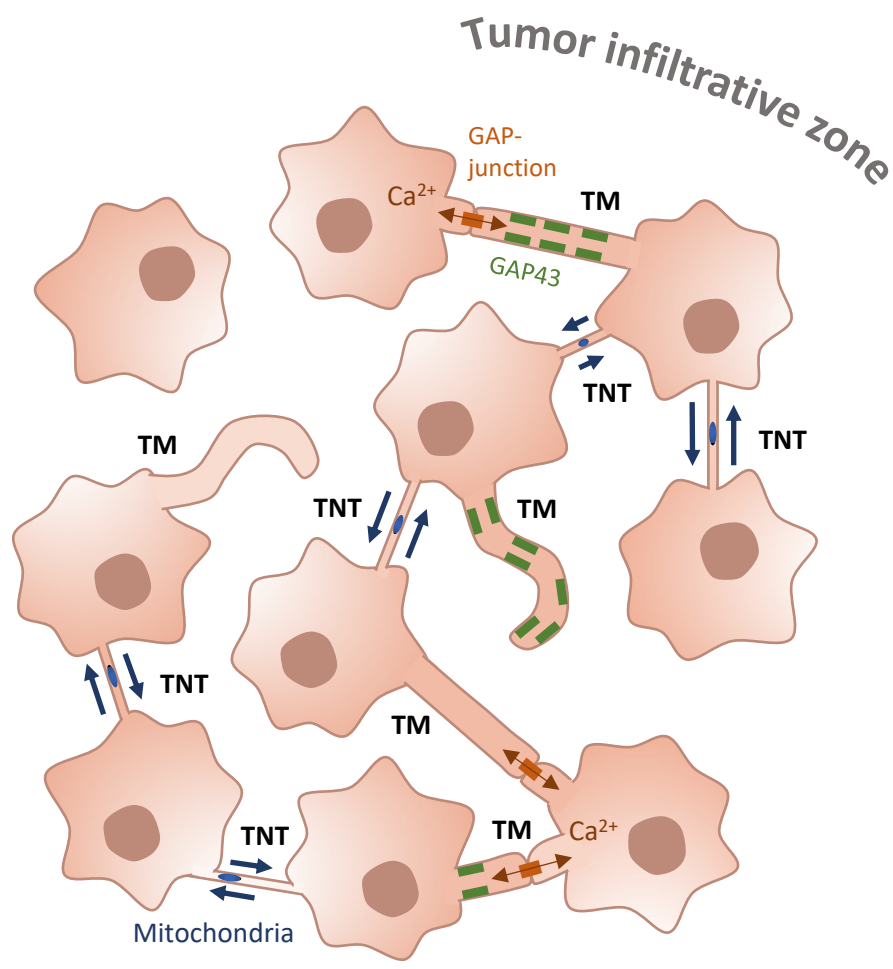

| Gene          | Forward                         | Reverse                      |
|---------------|---------------------------------|------------------------------|
| HPRT          | 5'-TAATTGGTGGAGATGATCTCTCAAC-3' | 5'-TGCCTGACCAAGGAAAGC-3'     |
| GFAP          | 5'-GGCAAAGCACCAAAGACGG-3'       | 5'-GGCGCGTTCCATTTACAAT-3'    |
| Olig1         | 5'-AGGTAACCAGGCGTCTCACAGT-3'    | 5'-CGGTACTCCTGCGTGTTAATGA-3' |
| Olig2         | 5'-CAGAAGCGCTGATGGTCATA-3'      | 5'-TCGGCAGTTTTGGGTTATTC-3'   |
| Sox-2         | 5'-AGACTAGGACTGAGAGAAAG-3'      | 5'-CCTCCTCCTCTGGCCGAT-3'     |
| TUB $\beta$ 3 | 5'-TCGTCCCGTCCGTGCGATTG-3'      | 5'-TTAGGGACGTGGTGTGGACG-3'   |
| Sox11         | 5'-CTAGCATGCAGAGTGTAGTG-3'      | 5'-AGAAGCTGGTTAGATCGAAG-3'   |
| GAP43         | 5'-GAACCTGAGGCTGACCAAG-3'       | 5'-AAGGGACTTCAGAGTGGAGC-3'   |
| CHI3L1        | 5'-CTTTGAGACCCAAAGTTCATG-3'     | 5'-ACGCTCTACGGCATGCTC-3'     |



1 **Supplementary material legends**

2

3 **Supplementary Figure 1. Metabolic features of C1 and C2 cells.** (A) MRI-FLAIR imaging of C patient  
4 glioblastoma co-registered with functional MRI for the measurement of CNI (Choline/N-  
5 AcetylAspartate Index), indicative of the metabolic activity of the tumor [39,40]. The enlargement  
6 on the infiltrative area shows the two tumoral regions resected to obtain C1 cells (are with CNI<2)  
7 and C2 cells (are with CNI>2). (B) Measurement of mitochondrial aerobic respiration profile using  
8 the Extracellular Flux Analyzer Seahorse XF96 **(a)** Schematic of the XF Cell Mito Stress Test used to  
9 determine the oxygen consumption rate (OCR) (<https://www.agilent.com>). **(b)** C1 and C2 cells were  
10 seeded in the Seahorse Bioscience microplates laminin-precoated (20,000 cells/well). After 12h, 1  
11  $\mu$ M oligomycin, 1  $\mu$ M FCCP (carbonyl cyanide-4-(trifluoromethoxy) phenylhydrazine), and 0.5  $\mu$ M  
12 rotenone/antimycin A were subsequently added. **(c)** Individual parameters for respiration, including  
13 non-mitochondrial oxygen consumption, basal respiration, proton leak, maximal respiration, spare  
14 respiration capacity, and ATP production, in C1 vs C2 cells. Data are presented as the mean  $\pm$   
15 standard deviation (3 independent experiments, 10 replicates each condition). Each data point  
16 represents an OCR measurement. \*p < 0.05, \*\* p < 0.005, \*\*\*\* p < 0.00005 C1 vs C2.

17

18 **Supplementary Figure 2. MitoGFP signal in acceptor cells matches with TOM20 mitochondrial**  
19 **marker staining.** (A) C2 MitoGFP (in green) and mCherry (in white) cells were co-cultured over 5  
20 days on laminin-coated coverslips, then fixed and stained with anti-TOM20 (in red), mitochondrial  
21 marker. Confocal images were acquired with 63x objective and deconvolved with Huygens software.  
22 Acceptor cells containing donor-derived MitoGFP signal overlapping with TOM20 staining were  
23 observed (z-stack=2; step size= 0.35  $\mu$ m), Scale bar 5  $\mu$ m. (B) A yellow arrow was drawn along the  
24 green mitochondria to obtain the intensity profile of MitoGFP and TOM20 signal. The two curves  
25 follow a similar trend. (C) The deconvolved 3-dimensional images of the area of the acceptor cells  
26 containing MitoGFP were reconstituted with Huygens Software. These images show volumes  
27 covered by MitoGFP and TOM20 signals and their overlap.

28

29 **Supplementary Figure 3. Movement of mitochondria by live-imaging in C2-tumor organoids inside**  
30 **TNT-like connections.** (A) C2 MitoGFP tumor organoids were imaged at 7 days of culture, images

31 composed of 25 z-stacks were acquired every 1 min for 13 min (step size 0.45  $\mu\text{m}$ , total thickness  
32  $\sim 12\mu\text{m}$ ) acquired with transmitted light and green fluorescence (MitoGFP). Left panel shows an  
33 overall vision of the TNT-like connection inside the tumor organoid a time 0 min. In the right panels  
34 are shown the areas magnified at different time points from 0 up time 13 min. White arrow points  
35 at mitochondria inside the TNT-like connection. Scale bar: 10  $\mu\text{m}$ . (B) 7 days-old C2 MitoGFP tumor  
36 organoids was fixed after the live-imaging and imaged by confocal microscopy. This image is the  
37 result of the z-projection of 11 stacks with 6  $\mu\text{m}$  of step for a total thickness of 66  $\mu\text{m}$ . The white  
38 frame with arrow is representative of the size of area where the live-imaging video was acquired,  
39 not of the specific location. Scale bar: 400  $\mu\text{m}$ .

40

41 **Supplementary Figure 4. TNT- and TM-like connections in cells derived from patient O tumor.** (A)  
42 Representative fluorescence images of the whole patient O-derived tumor organoid at 2 and  
43 23 days of growth using Pln-Apo 10X/0.45 objective of inverted confocal LSM700. The resulting  
44 images represent a max intensity projection of 6 and 6 sections (step size: 5 and 4  $\mu\text{m}$ ), respectively,  
45 stained for anti- $\alpha$ Tubulin (microtubules, white), Phalloidin (actin in red) and nuclei (blue). A  
46 magnification of a long TM-like extension is presented on the right panel. Scale bars are 300 (left)  
47 and 200  $\mu\text{m}$  (right). (B) Representative pictures of patient O-derived organoids at 2 days, stained for  
48 anti- $\alpha$ Tubulin (microtubules, green), Phalloidin (actin filaments, red), and nuclei (blue). Confocal  
49 images were acquired with 40X objective. Regions of interest show either  $\alpha$ Tubulin-devoid  
50 connections, defined as TNT-like ( $<1 \mu\text{m}$ ), or thick  $\alpha$ Tubulin-positive connections ( $>1 \mu\text{m}$ ), named  
51 TM-like. Dashed arrowheads indicate the absence of a fluorescent signal at the connection level,  
52 white-filled arrowhead show positiveness to the signal. Main image is the results of max intensity  
53 projections of 11 slices (step size: 0.5  $\mu\text{m}$ ), region of interest of TNT-like and TM-like connection  
54 correspond to the Z-stack 1 and 6, respectively. Scale bar: 20  $\mu\text{m}$ . (C) TM-like protrusion expressing  
55 GAP43 in patient O-derived organoids. 6 days-old organoids were fixed and stained with anti-GAP43  
56 (in green), phalloidin (actin filaments, in red) and DAPI (in blue). Confocal images with 40x objective  
57 were acquired. 3D reconstruction of a 11 sections image (step size: 0.5  $\mu\text{m}$ ) was performed using  
58 Imaris Viewer software. Regions of interest shows two TM-like GAP43-positive connections ( $>1 \mu\text{m}$ ).  
59 Scale bar: 5  $\mu\text{m}$ .

60 **Supplementary Figure 5. Mitochondria transfer analysis in organoids by flow cytometry.** (A)

61 Schematic of the experiment. We prepared co-culture organoids, mixing donor cells (MitoGFP) and  
62 acceptor cells (mCherry) in a 1:1 ratio, and monocolour organoids, using only donor or acceptor cells.  
63 Co-culture organoids were cultured overtime and desegregated at each timepoint to monitor the  
64 percentage of acceptor cells receiving donors' derived mitochondria (on the left). Monocolour  
65 organoids were cultured in the same culture medium separated by a 1  $\mu$ m filter (on the right). (B)  
66 Representative plot of co-culture organoids in C1 and C2 cells after 23 days of culture. GSLCs-derived  
67 co-culture organoids were prepared, individually from C1 and C2 cells, mixing in a 1:1 ratio donors  
68 cells (MitoGFP, on the Y axis) and acceptor cells (mCherry, on the X axis). After 23 days, duplicates  
69 of a pool of 3 organoids desegregated in a single cells suspension were analyzed separately by flow  
70 cytometry. Acceptor cells (mCherry) positive also for MitoGFP signal are framed in the red boxes.  
71 (C) Representative plot of secretion control in C1 and C2 cells after 23 days. Monocolour organoids,  
72 prepared of only acceptor cells (mCherry) or donor cells (MitoGFP) and cultured in the same culture  
73 medium separated by a 1  $\mu$ m filter for 23 days and desegregated in a single cells suspension and  
74 analyzed by flow cytometry. Acceptor cells (mCherry) positive also for MitoGFP signal are framed in  
75 the red boxes.

76

77 **Supplementary Figure 6. Cell proliferation after irradiation in co-culture experiments.** (A) Cell

78 growth in irradiated co-culture experiment in adherent conditions, relative to Fig.5B. For C1,  
79  $143970 \pm 6653$  and  $413000 \pm 101930$  cells were counted after 2 and 5 days, respectively, in the co-  
80 culture with irradiated cells (3 independent experiments). A significant reduction of cells was  
81 observed at day 5 compared to control condition (day 2:  $158000 \pm 28751$ ; day 5:  $568866 \pm 85332$ , 3  
82 independent experiments). For C2,  $199080 \pm 40341$  and  $456260 \pm 143521$  cells were counted after 2  
83 and 5 days, respectively, in the co-culture with irradiated cells (5 independent experiments). No  
84 significant difference was observed compared to control at the two timepoint in analyse (day 2:  
85  $182900 \pm 61890$ , day 5:  $505260 \pm 77515$ , 5 independent experiments). ANOVA two-way test was  
86 performed. P value  $< 0.05$  (\*), P values  $> 0.05$  are not significant and not indicated on the figure. (B)  
87 Effect of irradiation on cell number in tumor organoids, relative to Fig.5C. Irradiation was performed  
88 after 5 days from the organoid preparation. Duplicates of a pool of 3 organoids were dissociated in  
89 a single cell suspension and counted at each timepoint. Control C1: day 6  $24800 \pm 5768$ ; day 9  
90  $63150 \pm 18350$ ; day 13  $105850 \pm 43970$ ; day 16  $140450 \pm 33929$ ; day 20  $158600 \pm 60394$  day 23

91 181800±78820. Irradiated C1: day 6 24767±14749; day 9 47100±18499; day 13 74700±28446; day  
92 16 100050±32374; day 20 100700±32051; day 23 119000±29480 (4 independent experiments).  
93 Control C2: day 6 22600±3704; day 9 49700±8116; day 13 104200±33870; day 16 108580±42218;  
94 day 20 128800±34478; day 23 145080±47726. Irradiated C2: day 6 16667±6853; day 9  
95 57150±16787; day 13 70250±29190; day 16 83400±29947; day 20 97725±10594; day 23  
96 115600±23118 (4 independent experiments). The cell number was transformed into a logarithmic  
97 scale and slopes were compared by linear regression (dashed lines). No significant difference was  
98 observed between control and irradiated condition in both GSLCs.

99

100 **Supplementary video 1: Movement of mitochondria along TNT-like connections in 2D-conditions.**

101 C2 MitoGFP cells were plated on laminin-coated surface and imaged after 6h. 18-z-stacks images  
102 were acquired every 1 min for 27 min (step size: 0.47 μm) with merged transmitted light and green  
103 fluorescence (MitoGFP). The movie, resulting from the max z-projection of each time-frame, shows  
104 the transfer of mitochondria between two C2 cells expressing MitoGFP and connected by TNT-like  
105 connection in 2D culture. Scale bar 10 μm.

106

107 **Supplementary video 2: Transfer of mitochondria via TNT-like connections in tumor organoids.**

108 C2 MitoGFP tumor organoids were imaged at 6 days of culture, images composed of 62 z-stacks  
109 were acquired every 1 min for 38 min (step size 0.45 μm, total thickness ~28 μm). On the left panel,  
110 video corresponding to the merge of time-frame images acquired with transmitted light and green  
111 fluorescence (MitoGFP). Only green fluorescence image is shown in the right panel, for better  
112 visualization. Videos are resulting from the max-z-projection. White and red arrows point at the  
113 movement of mitochondria inside TNT- and TM-like connections, respectively. Scale bar 10 μm.

114

115 **Supplementary video 3: Motion of mitochondria inside TNT-like connections in tumor organoids.**

116 C2 MitoGFP tumor organoids were imaged at 7 days of culture, images composed of 25 z-stacks  
117 were acquired every 1 min for 13 min (step size 0.45 μm, total thickness ~12μm). Video corresponds  
118 to the merge of time-frame images acquired with transmitted light and green fluorescence  
119 (MitoGFP). White arrow points at mitochondrion inside the TNT-like connection. Scale bar 10 μm.

# Supplementary Figure 1

A

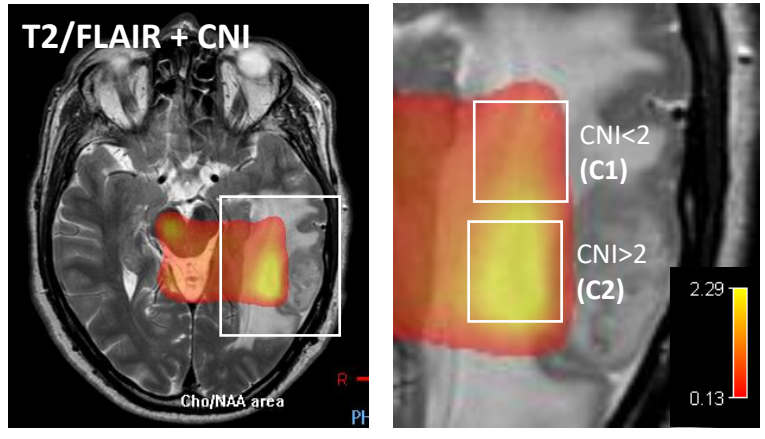

B

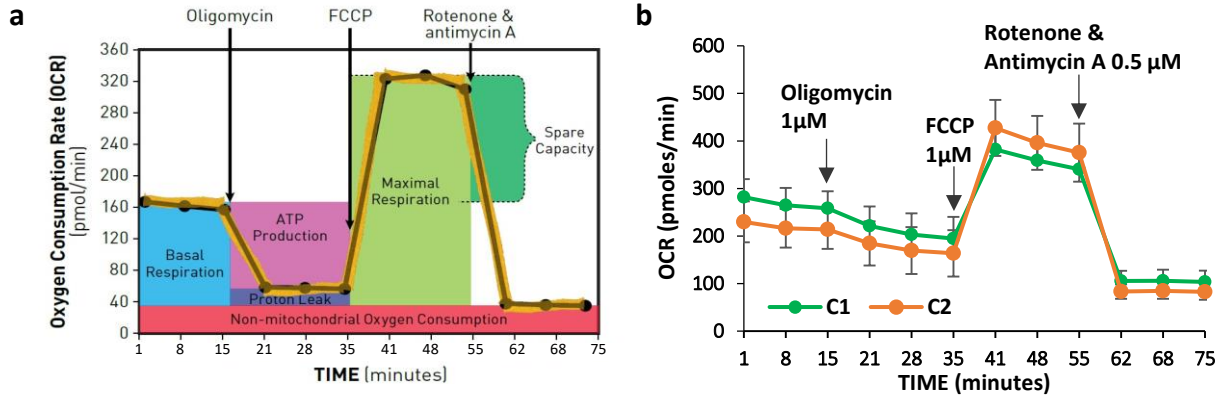

C

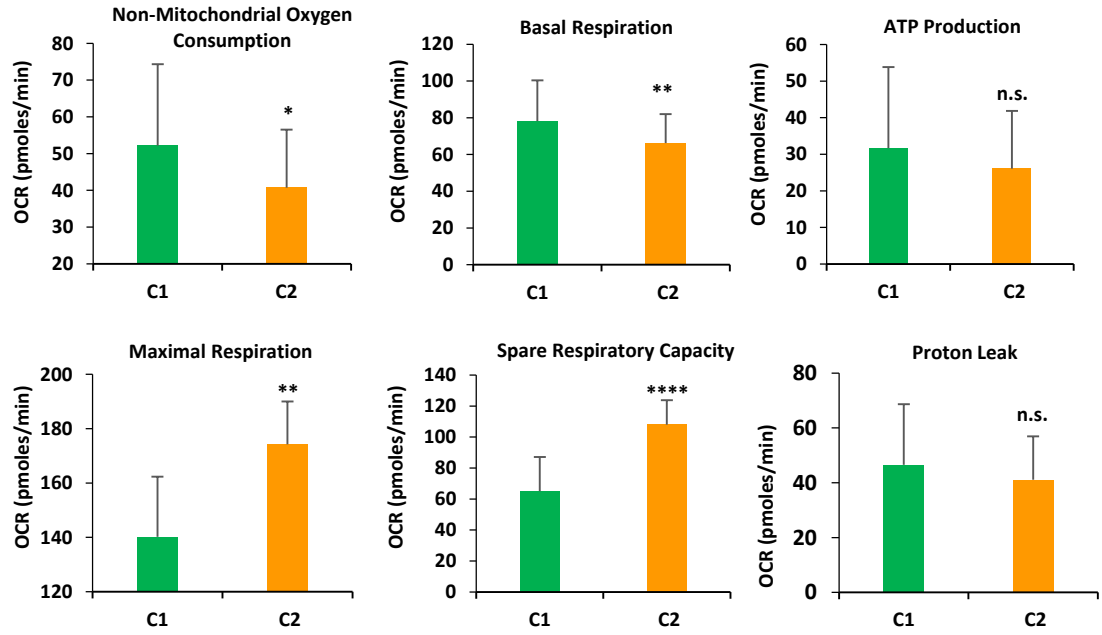

# Supplementary Figure 2

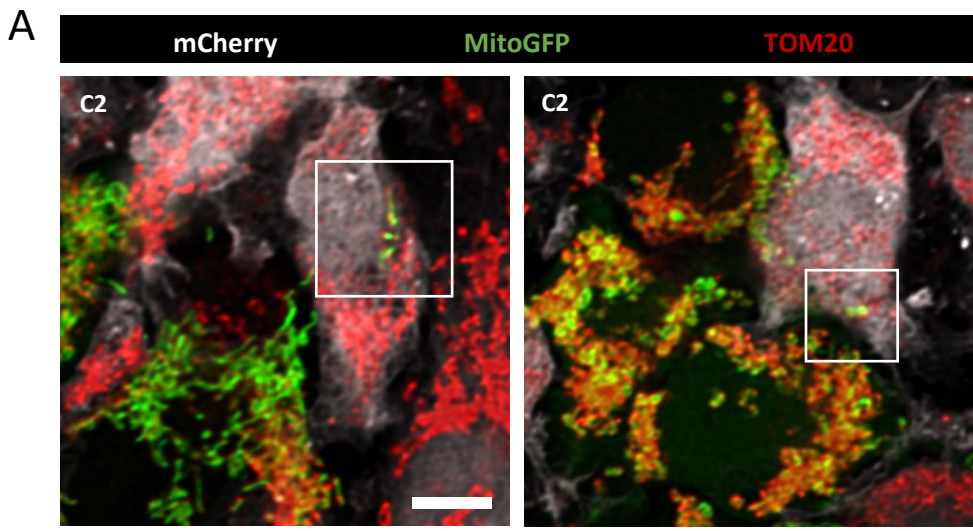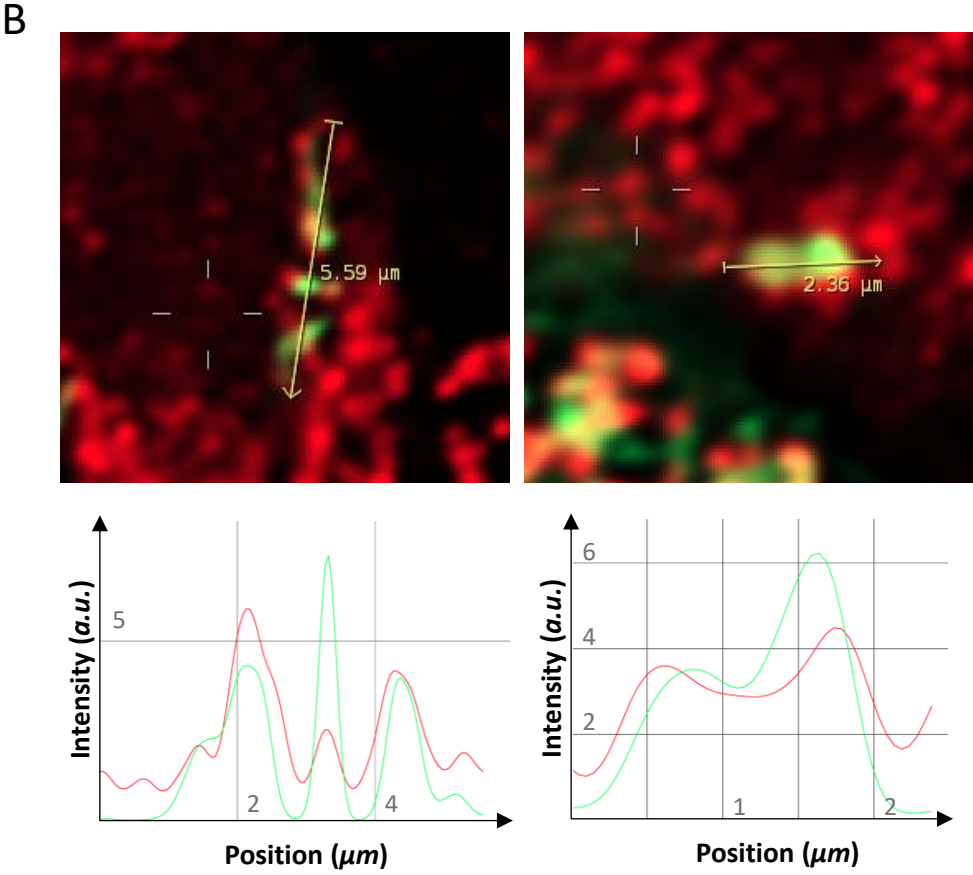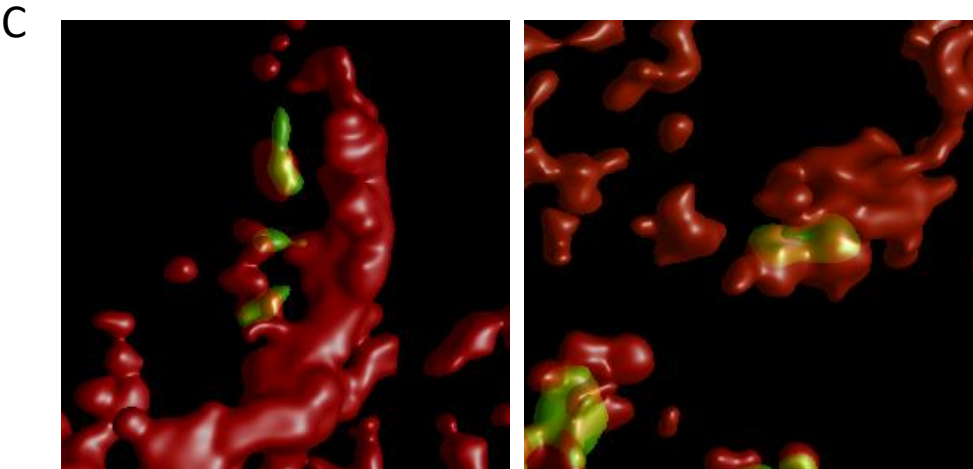

# Supplementary Figure 3

A

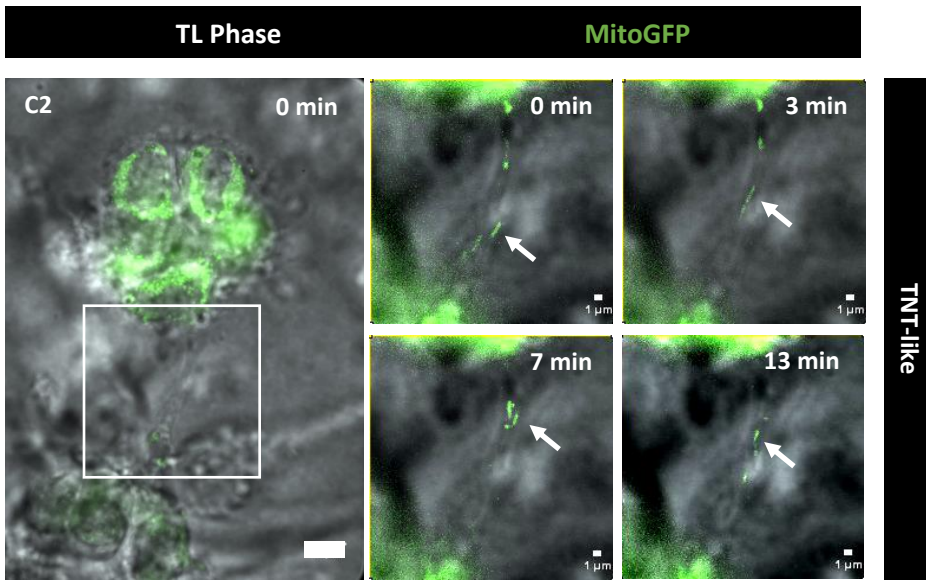

B

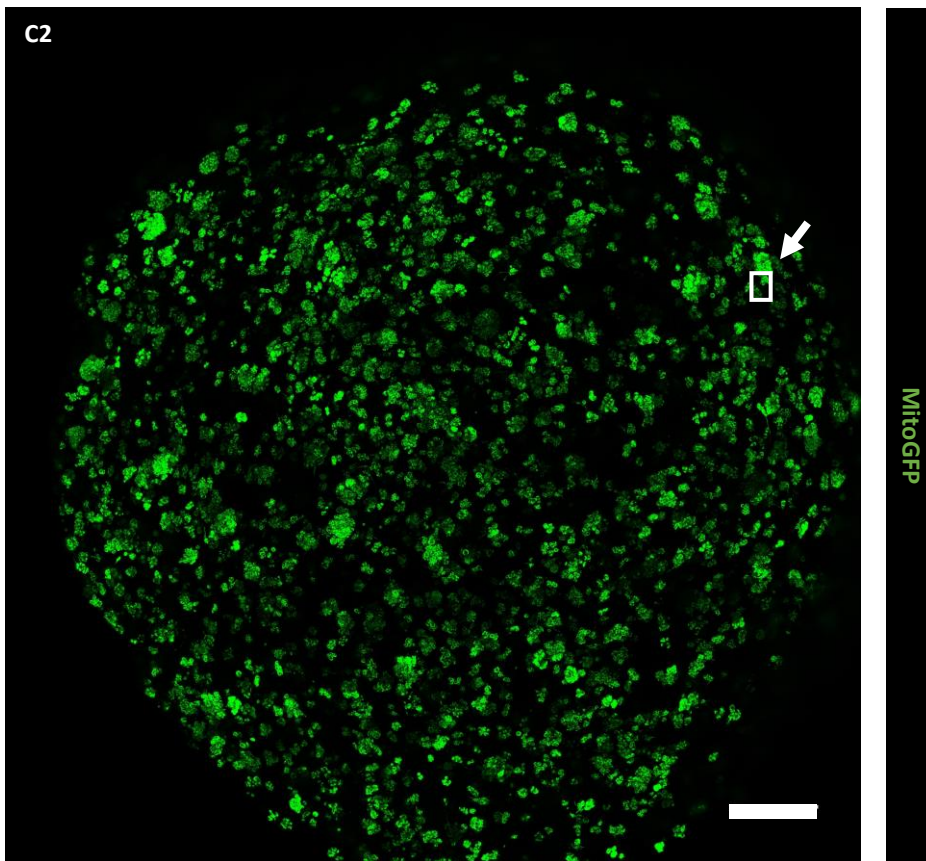

# Supplementary Figure 4

A

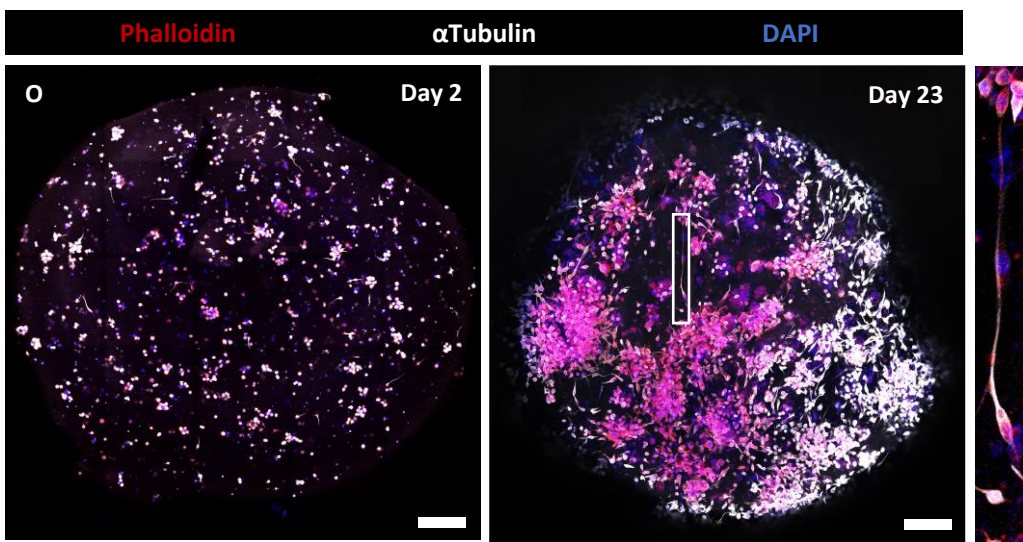

B

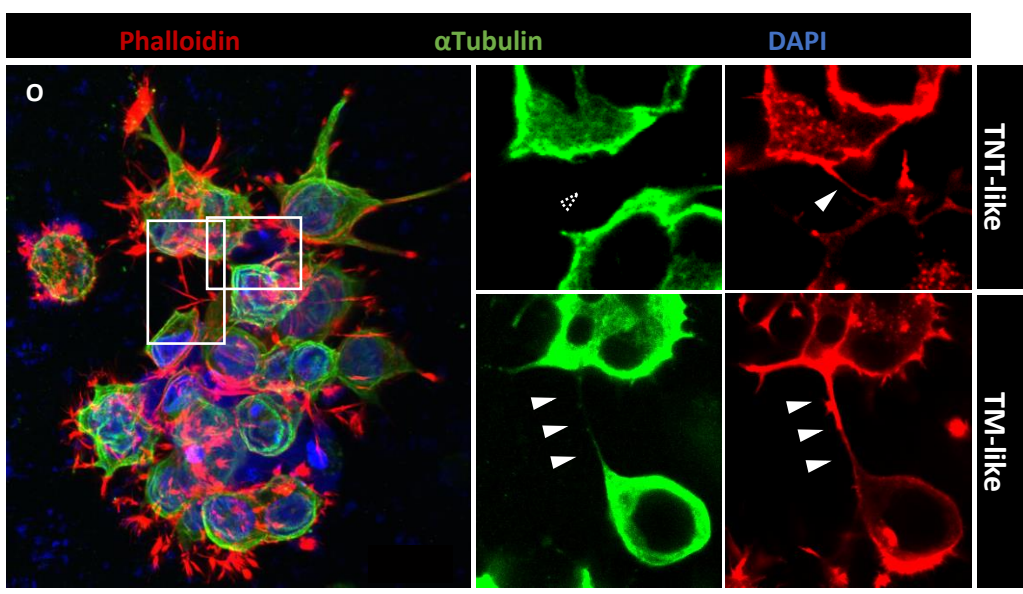

C

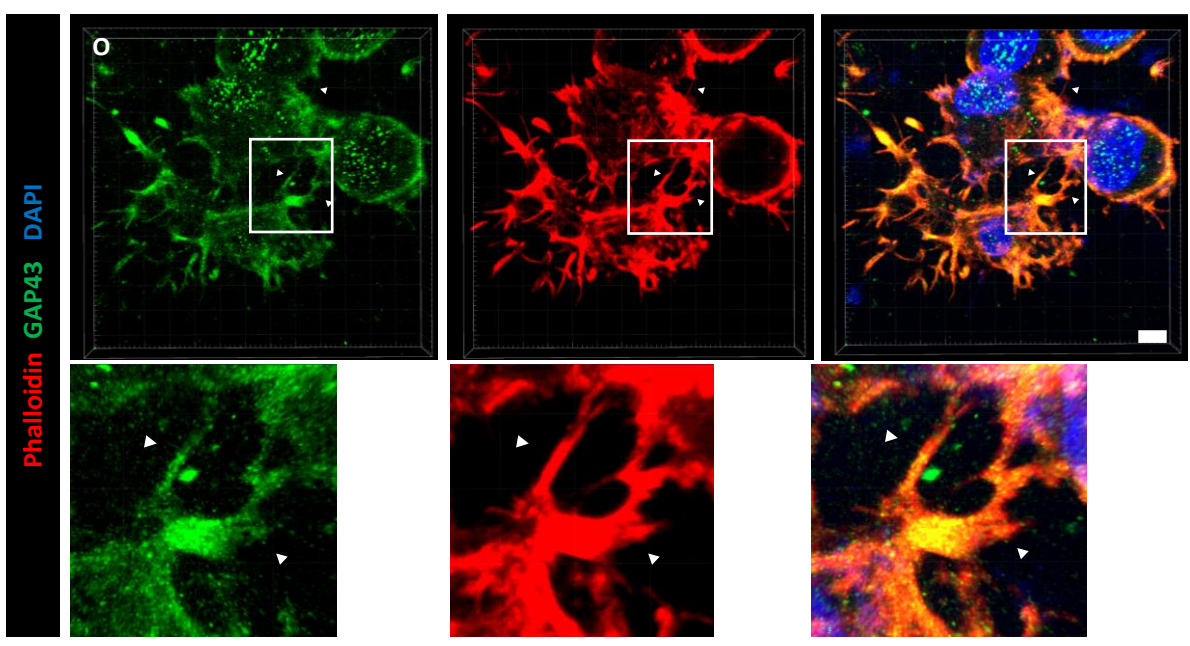



# Supplementary Figure 5

A

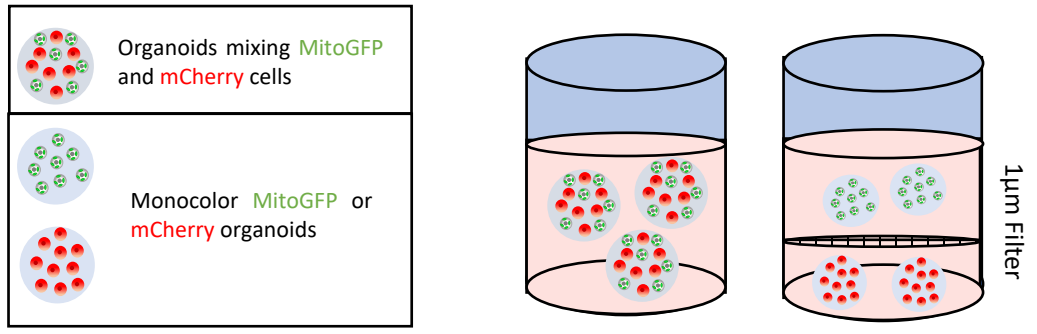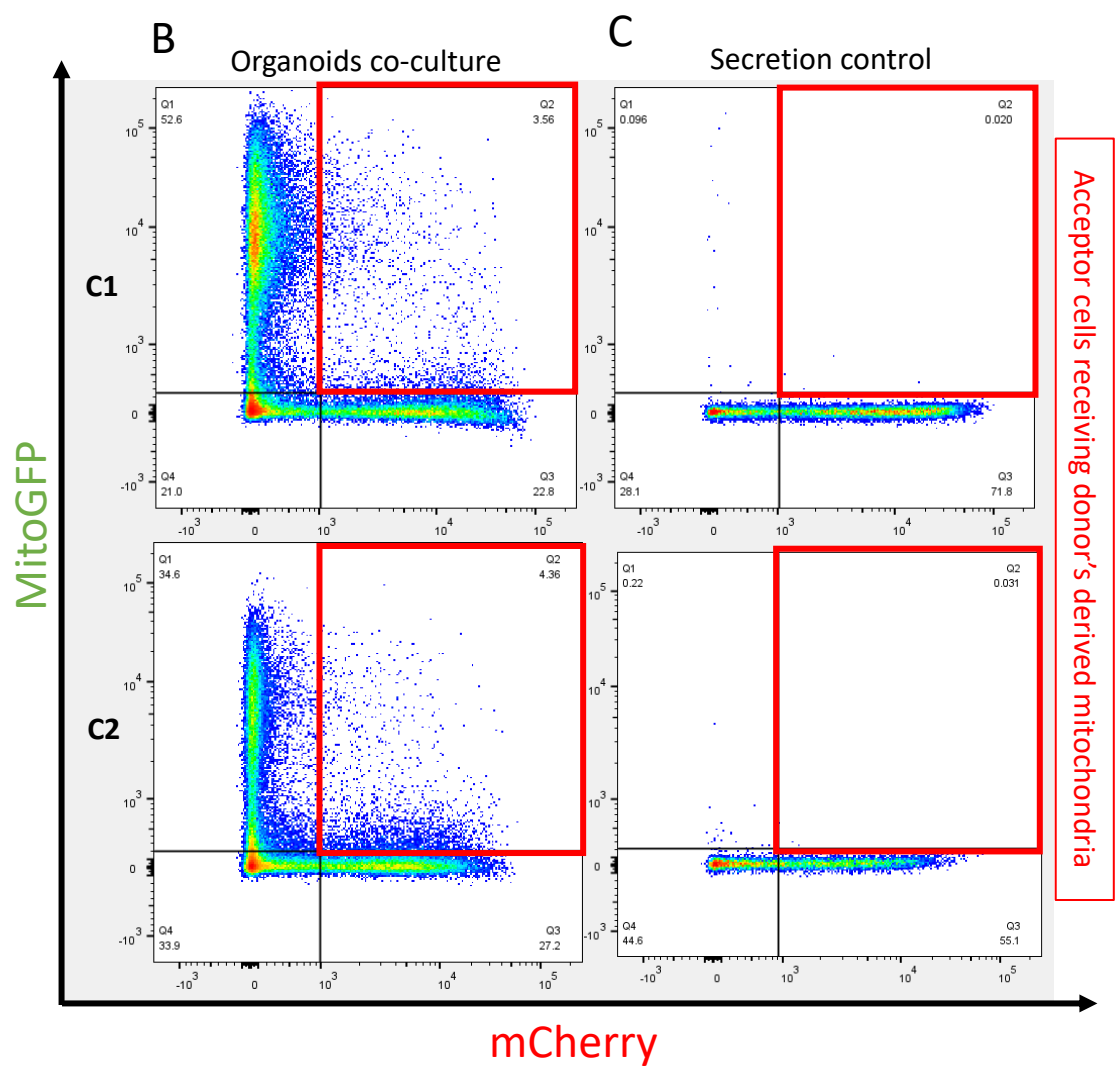

# Supplementary Figure 6

A

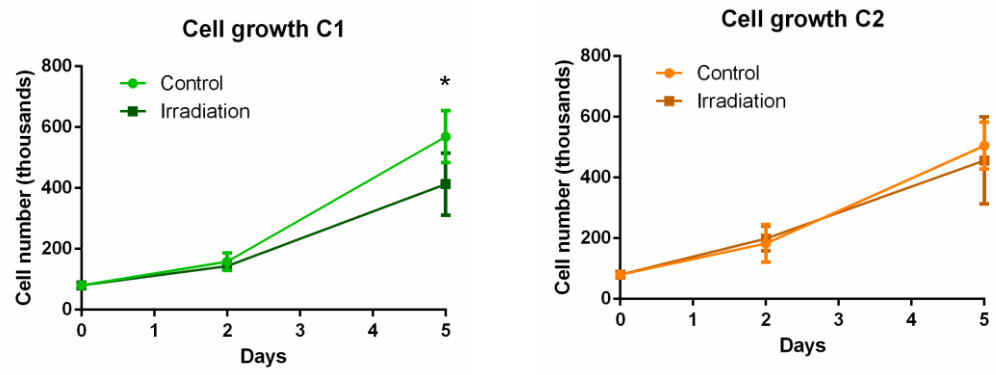

B

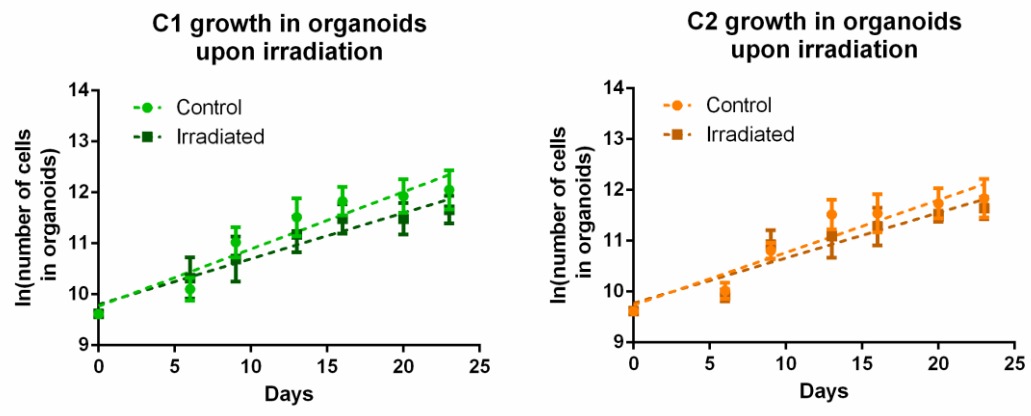

Source: https://www.biorxiv.org/content/10.1101/2020.11.21.392597v1.full.pdf
